# Supplementary material for: Estimating pre-symptomatic transmission potential of influenza A and B viruses in household transmission studies
Source: Research Square preprint supplement (doi:10.21203/rs.3.rs-7701955/v1), 2025-12-01

Influenza A: Gamma Infectiousness

Susceptibility: Age < 6 vs. 18 – 50

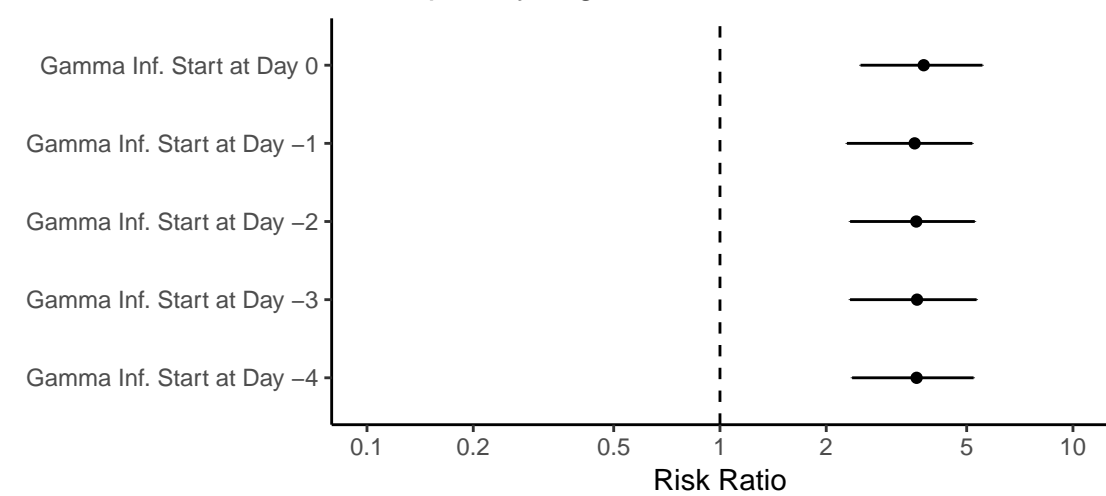

Susceptibility: Age 6 – 17 vs. 18 – 50

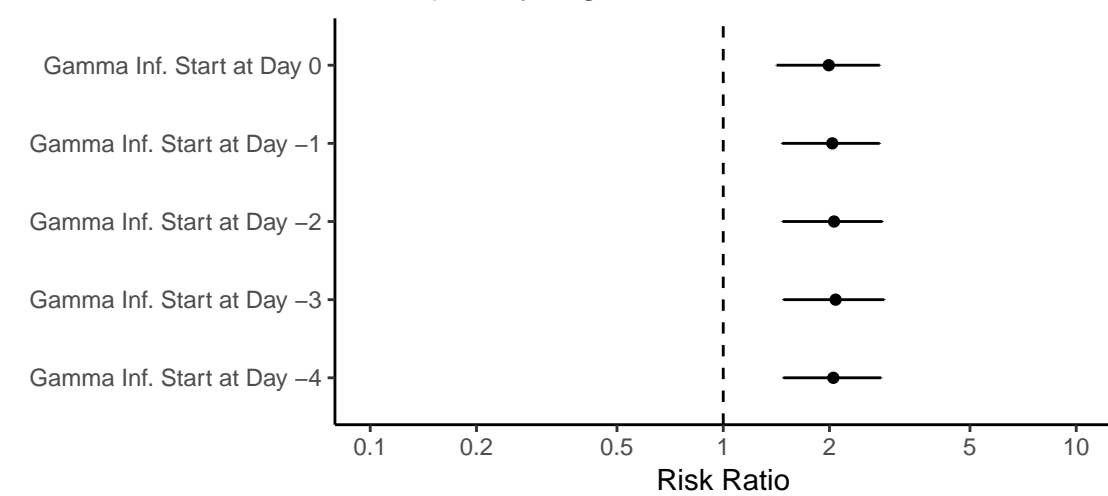

Susceptibility: Age >50 vs. 18 – 50

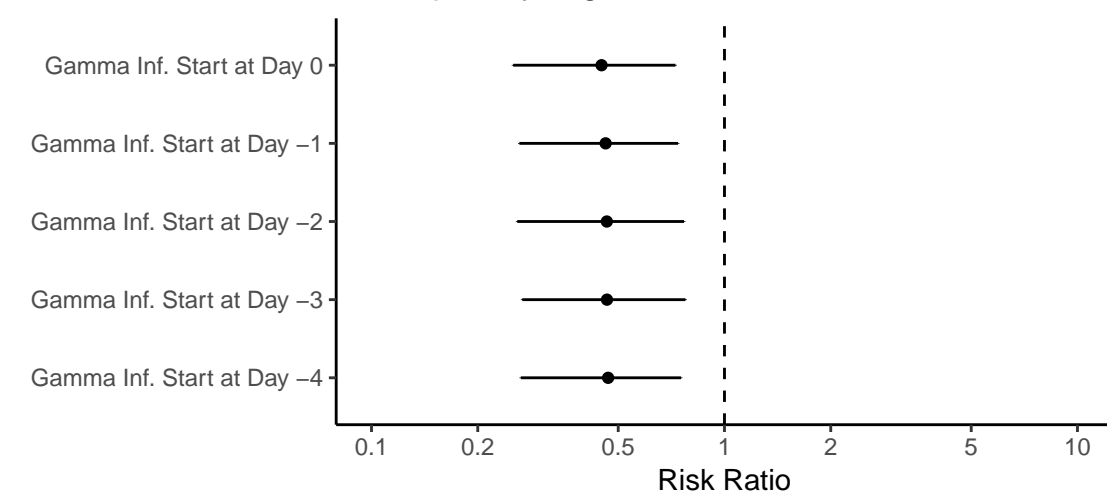

Susceptibility: Vaccination

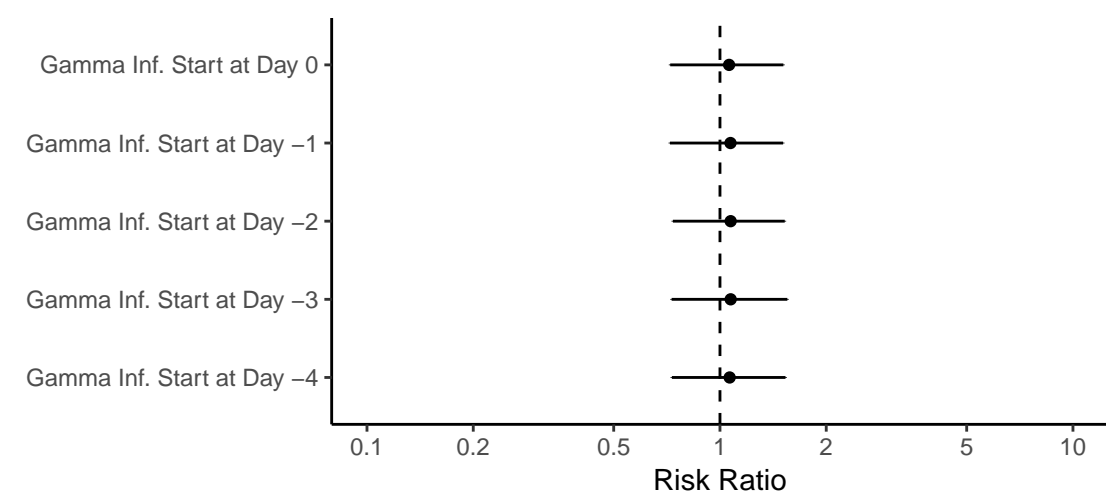

Infectiousness: Age < 6 vs. Adults

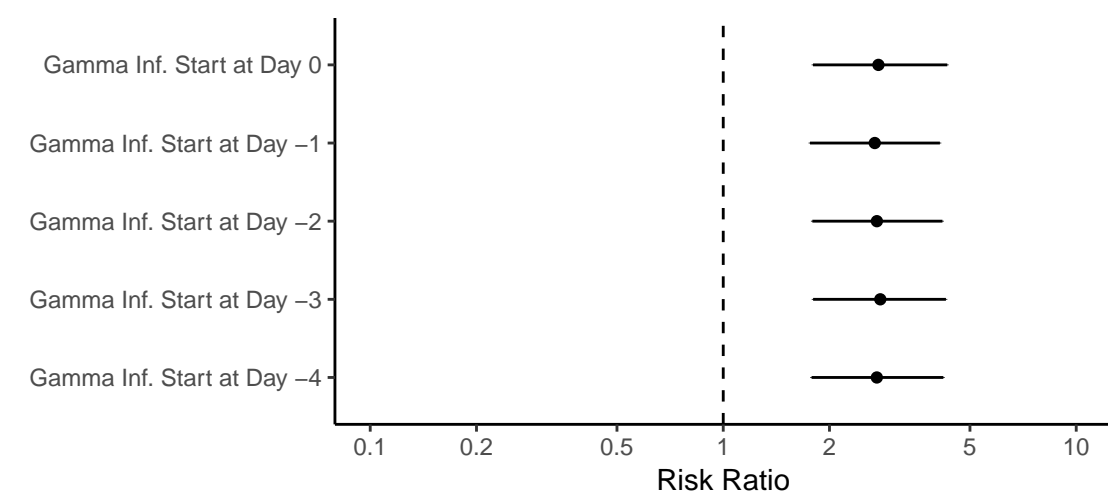

Infectiousness: Age 6 – 17 vs. Adults

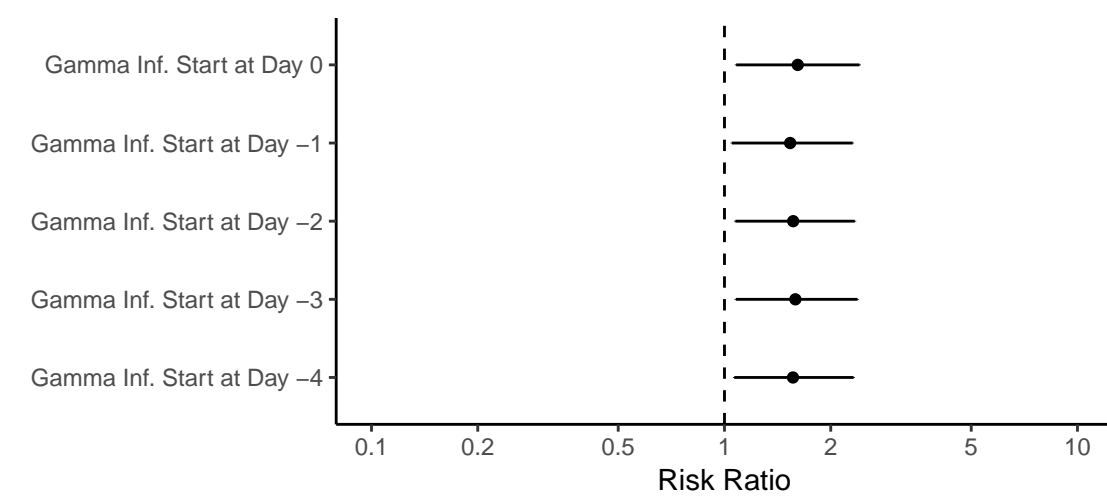

Infectiousness: Viral Load at Symptom Onset

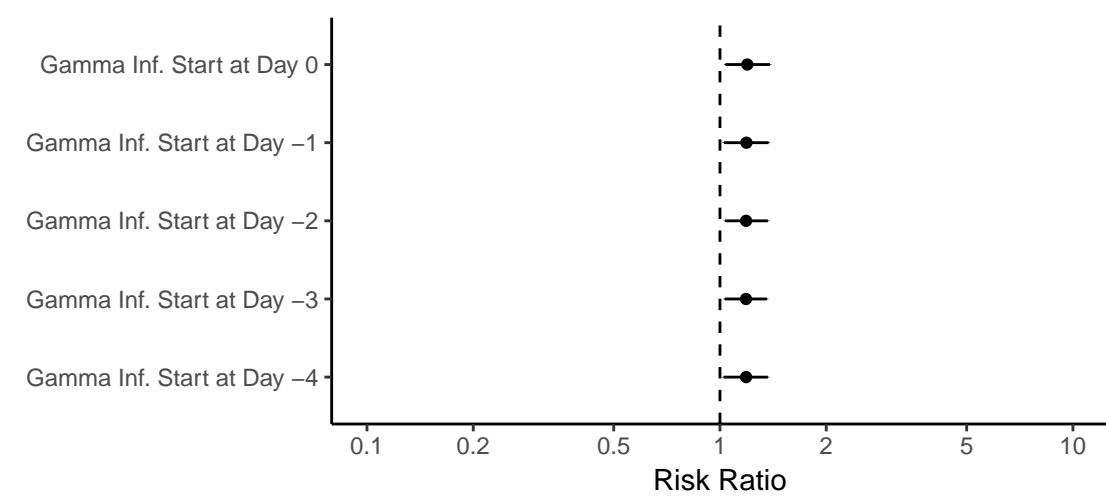

Infectiousness: Fever

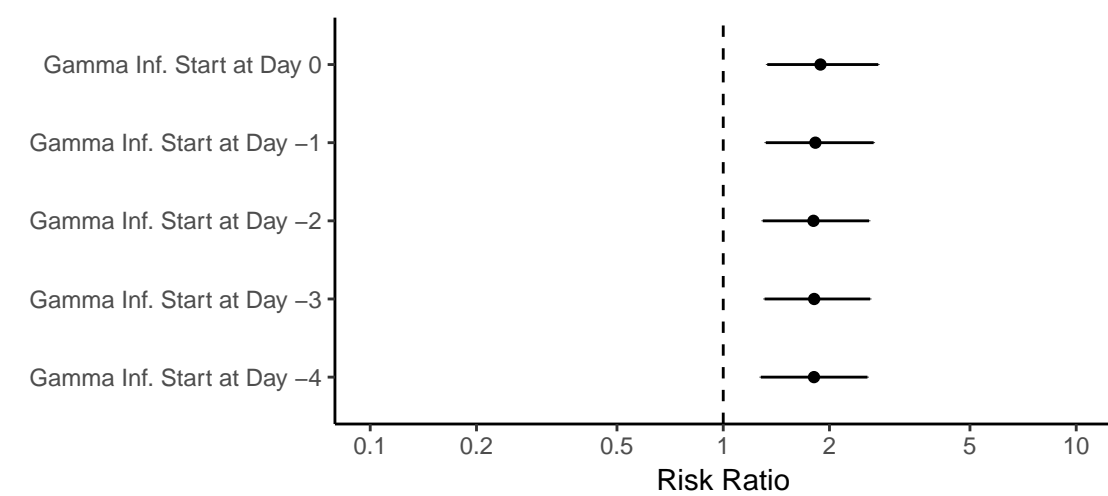

Infectiousness: Antiviral

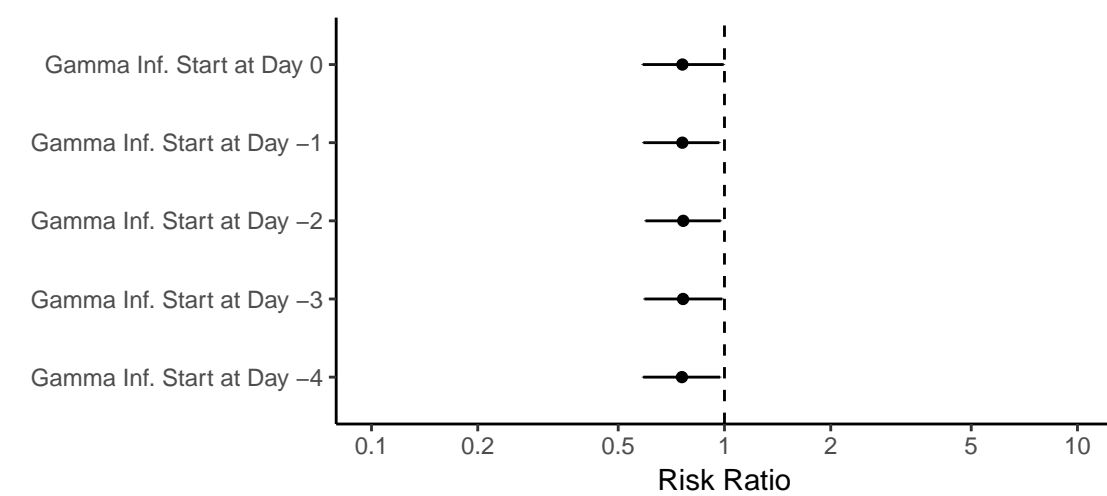

Infectiousness: A(H1N1)pdm vs. A(H1N1)

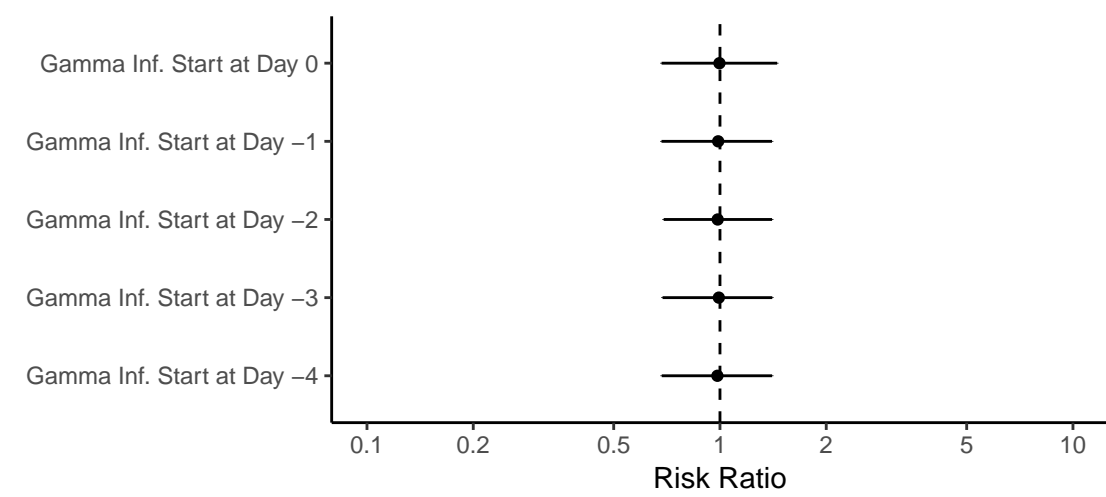

Infectiousness: A(H3N2) vs. A(H1N1)

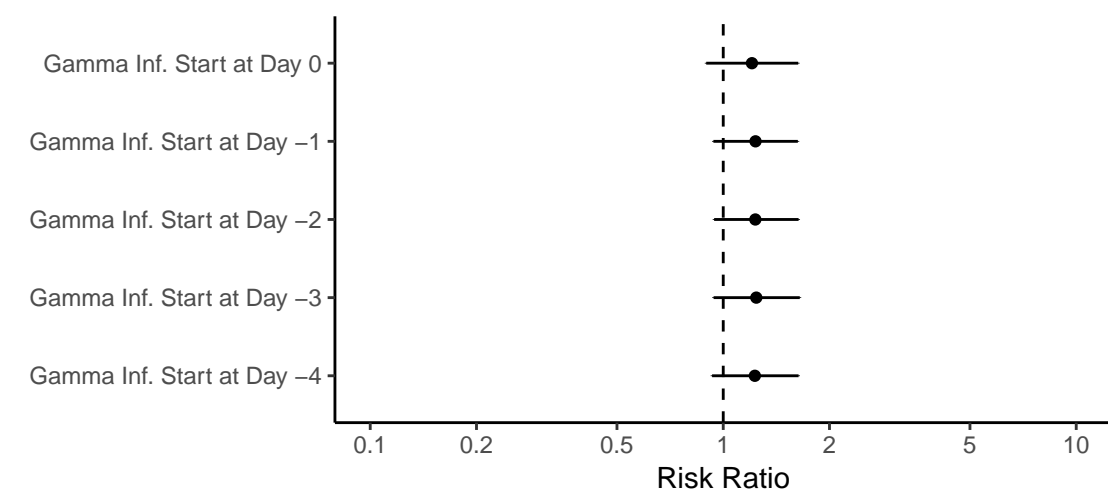

Infectiousness: Household Size 4 – 5 vs. Size 3

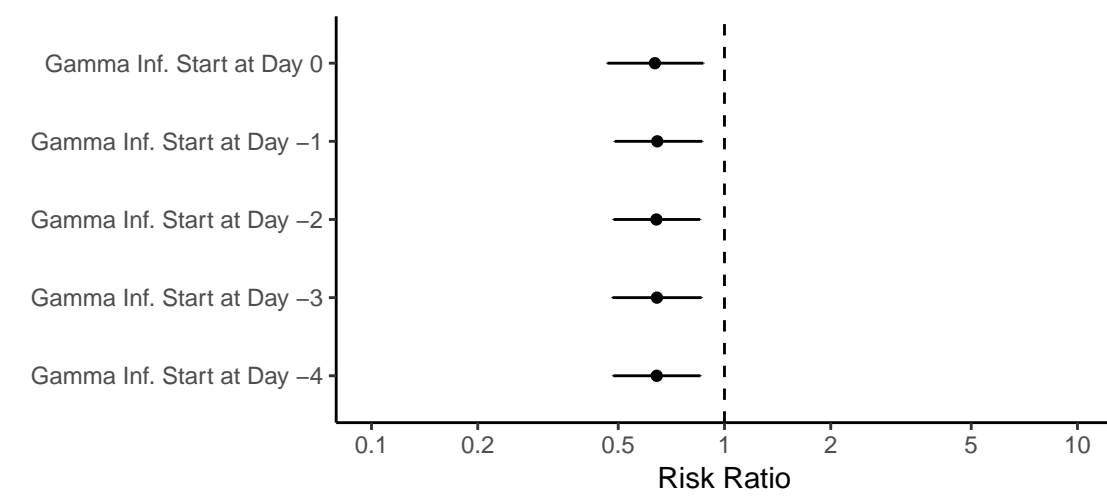

Infectiousness: Household Size >5 vs. Size 3

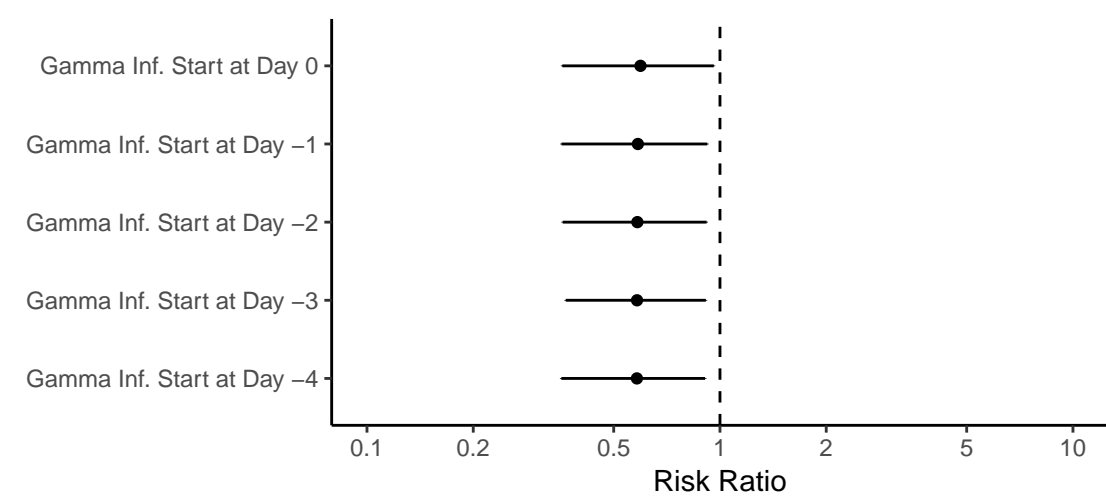

Supplement: Supplementary file 1 [file 05b182d1a3cd2e609d19bbc3.pdf]
