# Supplementary material for: Estimating pre-symptomatic transmission potential of influenza A and B viruses in household transmission studies
Source: Research Square preprint supplement (doi:10.21203/rs.3.rs-7701955/v1), 2025-12-01
Supplement: Supplementary file 1 [file 6719656d2cd36a9aee9db1ff.docx]

**Supplementary Material**

**for Estimating pre-symptomatic transmission potential of influenza A and B viruses in household transmission studies**

Chengyao Zhang1, Xiaotong Huang1, Vicky J. Fang1, Kwok-Hung Chan2, Gabriel M. Leung1,3, Dennis K. M. Ip1, J. S. Malik Peiris1,4, Benjamin J. Cowling1,3, Simon Cauchemez5, Tim K. Tsang1

**Affiliations:**

1. WHO Collaborating Centre for Infectious Disease Epidemiology and Control, School of Public Health, Li Ka Shing Faculty of Medicine, The University of Hong Kong, Hong Kong Special Administrative Region, China.

2. Department of Microbiology, Li Ka Shing Faculty of Medicine, The University of Hong Kong, Hong Kong Special Administrative Region, China.

3. Laboratory of Data Discovery for Health Limited, Hong Kong Science and Technology Park, New Territories, Hong Kong.

4. HKU-Pasteur Research Pole, The University of Hong Kong, Hong Kong Special Administrative Region, China.

5. Mathematical Modelling of Infectious Diseases Unit, Institut Pasteur, Université Paris Cité, UMR2000 CNRS, Paris, France.

**Contents**

[1 Model of influenza viral shedding trajectories 3](#_Toc205307435)

[2 Household transmission models 3](#_Toc205307436)

[2.1 Model overview 4](#_Toc205307437)

[2.2 Infection time and incubation period 4](#_Toc205307438)

[2.3 Person-to-person hazard of infection in household 5](#_Toc205307439)

[2.4 Infectiousness profile 6](#_Toc205307440)

[2.5 Hazard of infection from community 8](#_Toc205307441)

[2.6 Total hazard of infection 8](#_Toc205307442)

[2.7 Likelihood 8](#_Toc205307443)

[2.8 Model Inference 10](#_Toc205307444)

[3 Model comparison 10](#_Toc205307445)

[4 Model validation 11](#_Toc205307446)

[5 Model adequacy 12](#_Toc205307447)

[6 References 12](#_Toc205307448)

[7 Appendix figure legends 13](#_Toc205307449)

# Model of influenza viral shedding trajectories

We used the viral load at symptom onset as the proxy of individual influenza A and B viral shedding to investigate its association with infectiousness in households, however, not all participants received PCR tests on the day of symptom onset. Therefore, we employed a log-linear mixed-effect regression model considering censored responses to impute the trajectories of viral shedding and the viral load at symptom onset [[1-5](#_ENREF_1)] (Appendix Figure 1). We assumed that the viral load increased linearly from infection and peaked at symptom onset, then decreased linearly [[6](#_ENREF_6)]:

represented the censored value of viral shedding since the true value might below the lower detection limit of PCR test (900 copies/mL). The intercept and the error term both followed normal distributions, and we assumed that for all individuals, the viral load increased at a shared rate () before illness onset () and dropped with another shared slope () after peaked at symptom onset (). Therefore, because of the assumption of shared rates, cases with higher viral load at symptom onset also had longer duration of viral shedding and a larger area under the viral shedding curve. We also included the effect of being the index case in the household () in the regression model.

To consider the potential effect of age on viral shedding, for each virus we fitted two separate viral trajectories models for children and adults respectively (Appendix Table 1). Predicted viral load at symptom onset was standardized and added to the transmission model as a continuous covariate for individual infectiousness. It was found that index cases tended to have higher viral shedding, and no difference in viral shedding trajectories between children and adults was observed (p>0.01, two-sample t-tests).

# Household transmission models

## Model overview

The transmission dynamics of influenza and SARS-CoV-2 virus in households was modelled by an individual-based hazard model, describing the risk for household members to be infected at each time point after an index case introduced the virus into the household [[5](#_ENREF_5), [7-9](#_ENREF_7)]. The risk of infections relied on the incubation period and the infectiousness profile, considering the contribution of pre-symptomatic transmission and infections acquired from the community. We denote symptom onset time and infection time of each infected case to reconstruct the transmission dynamics, as well as characteristics of cases and ofcontacts to estimate their effects on transmission heterogeneity.

## Infection time and incubation period

We assumed that the length of the incubation period followed a discretized log-normal distribution. Given a continuous distribution of incubation period , we discretized and re-normalized it as:

was the length of incubation, from 1 day to the maximum length of incubation days.

Our datasets only contained the record on the date of illness onset , hence we derived the likelihood of an infection time for a participant according to the density function of the incubation period . The assumed maximum incubation periods of influenza A and B virus were 5 days, and followed discretized log-normal distributions and respectively. The medians were equal to 1.4 and 0.6 days and the dispersions were both 1.51 [[10](#_ENREF_10)]. SARS-CoV-2 had a longer incubation, so we assumed that the maximum of SARS-CoV-2 Omicron BA.5 variant incubation was 7 days, following a discretized log-normal distribution with median equal to 3.04 and mean 3.27 [[11](#_ENREF_11)].

## Person-to-person hazard of infection in household

The hazard for a susceptible household contact to be infected at time by a household infector was described as:

which was the product of the baseline household transmission hazard (), the effects of factors affecting susceptibility () and infectiousness (), as well as the infectiousness profile ().

We estimated and to evaluate the effects of various characteristics on influenza transmission. In the influenza A model, we selected age and vaccination status as factors affecting susceptibility, and age, use of antiviral, standardized predicted viral load at symptom onset, fever symptoms, virus subtypes and household size as factors affecting infectiousness [[5](#_ENREF_5), [12](#_ENREF_12)].

The model explored the susceptibility of pre-school children (), school-age children () and old population () compared to the reference group, adults aged between 18 and 50 years old. In addition, we estimated the effect of vaccination () on individual susceptibility. For infectiousness, we also quantified the effects of being pre-school children () and school-age children (), taking adults as reference. And the effects of antiviral treatment () and the presence of fever symptoms () were also evaluated. Predicted viral load at symptom onset was standardized then added in the model as a continuous covariate, therefore represented the change in individual infectiousness when the standardized viral load increased by one standard deviation (0.69 copies/mL). Among three virus subtypes included in the study, seasonal A(H1N1) was chosen as the reference group, and we investigated the infectiousness of seasonal A(H3N2) (), pandemic A(H1N1) (). Finally, we added the effects of larger household size, including households containing 4 or 5 members () as well as more than 5 members (). The same structure was used for influenza B model as well, except for the effect of subtypes, we chose unsubtypable flu B as the reference group, and estimated the infectiousness of Victoria () and Yamagata () viruses.

The SARS-CoV-2 data had fewer available characteristics that could be tested as factors affecting transmission. Therefore, for the model for Hong Kong Omicron variant data, we included age and vaccination status as the factor affecting susceptibility, and age, symptoms and household size as the factor affecting infectiousness:

We investigated the difference in infectiousness between children and adults (), as well as whether SARS-CoV-2 cases had different individual infectiousness in larger households compared to households with 3 members (). Besides, we estimated susceptibility of children () and the old (), taking adults between 18 and 50 years old as the reference group, and that of contacts received more than 2 doses of vaccination ().

## Infectiousness profile

The infectiousness profile was the probability that the infection occurred at time , given the infector was infected at , depending on the symptom onset time of () and the shift of distribution (). It followed a discretized and shifted Gamma distribution or a shifted Poisson distribution. The value of was allowed to be negative, as the infection could occur prior to the symptom onset of the infector. We assumed that the infectious period started at days before symptom onset, therefore infections first emerged on days before symptom onset, and meant that infections started on the day of symptom onset and there was no pre-symptomatic transmission. We also assumed that the infectious period could not last for more than 14 days after the presence of symptoms. Therefore, the length of the infectious period was fixed at . Moreover, if the length of incubation of , where was the infection time was shorter than the pre-symptomatic phase of the infectious profile (), all probabilities prior to infection time were 0 (), and the remaining densities would be re-normalized to ensure the sum was 1 (). Therefore, under the assumption of Gamma-distributed infectiousness profile, we estimated the shape and the scale of Gamma distribution with a probability density function , and the infectiousness profile was:

Or under the assumption of Poisson-distributed infectiousness profile, the mean of with a probability mass function was estimated, hence the infectiousness profile was:

Then, the total proportion of pre-symptomatic transmission, which was defined as transmission occurred at least 1 day prior to symptom onset, was estimated as:

where was the distribution of the incubation period.

## Hazard of infection from community

The hazard of transmission from extra-household community for household member was modelled as . For influenza A, we assumed:

The baseline hazard was proportional to the observed incidence of influenza A in the community () [[13](#_ENREF_13)], and the proportionality would be estimated. For influenza B and SARS-CoV-2, we did not incorporate the observed virus activity and directly estimated the baseline hazard from community . The hazard from community was also adjusted by the effects on individual susceptibility ().

## Total hazard of infection

Total hazard of infection for a susceptible participant at time was the sum of person-to-person transmission of being infected by all infected household members, and the hazard from community, described as:

## Likelihood

Infection times of cases within households were unknown, therefore to calculate the likelihood of a household, we considered all possible combinations of infection times, calculating the total likelihood of the household from marginal likelihoods of the household with different combinations. According to the distribution of the incubation period, we can generate the probability of each combination as , assuming that case was infected at infection time and had symptom onset time at .

Then, we introduced a probability threshold . If , we assumed that this combination was not likely to occur, and the marginal likelihood was 0. For combinations with , the member with the earliest infection time was regarded as the index case, and the earliest infection time was the starting time of the follow-up period, therefore, the log-likelihood would be calculated. If more than one member had the same infection time which was earlier than all other infected members, one member would be set as the index cases and the others were treated as household contacts infected at the beginning of the follow-up.

The model has provided the estimation of the transmission hazard. Therefore, we derived the probability of susceptible participant to be infected at time as:

Then, the probability of a general participant to be infected exactly at infection time was the product of the probability that was not infected at all time points between the beginning of follow-up period and , and the probability that susceptible was infected at :

Particularly, contacts who had the same infection time as the index case were infected at , and only due to the hazard from community without any possibility of being infected by household members. The probability for these members would be:

On the other hand, the probability that a participant remained uninfected until the end of study was derived as:

We assumed that for uninfected members, the final time , and the marginal log-likelihood for the household given the combination of infection times was therefore:

Then, the total log-likelihood of the household was:

And finally, the total log-likelihood of transmission was the sum of log-likelihood of all households included in the analysis.

## Model Inference

Model parameters were jointly estimated by the Bayesian Markov Chain Monte Carlo (MCMC) metropolis-hasting algorithm. 30,000 iterations including 10,000 burn-in iterations were run with a thinning interval of 2.

Unknown model parameters to be estimated included the mean and the variance of the infectiousness profile distribution, the baseline hazard of household transmission (), the proportionality of the baseline hazard of community transmission (), and the coefficients for effects of factors affecting individual transmission heterogeneity ( and ). We employed vague uniform prior for all parameters, for two non-negative baseline hazard parameters we used and for coefficients of covariates we adopted . And for the mean of infectiousness profile, we used as the prior for influenza and SARS-CoV-2 Omicron variant.

# Model comparison

Deviance Information Criterion (DIC) value was used to evaluate the goodness-of-fit of models [[14](#_ENREF_14)]:

represented 10,000 sets of model parameters drawn from the joint posterior distribution, was the mean of 10,000 log-likelihoods, and was the likelihood calculated using the mean of posterior distribution. Models with lower DIC values had better goodness-of-fit, and the difference in the goodness-of-fit between two models was substantial if the difference between two DIC values was greater than 5 [[14](#_ENREF_14)].

# Model validation

We adopted a simulation-based validation process to assess whether the model could provide unbiased estimations for parameters. To simulate a dataset, for each household, infected household members who reported symptom onset before the first PCR test were candidates for the primary case, and we randomly chosen one primary case among these candidates, determined its infection time following the log-normal distribution of the incubation period. All other members except the chosen primary case were set as susceptible. The simulation began at the infection time of the primary case, and we evaluated whether household contacts would be infected according to the hazard calculated using estimated parameters. Once a contact was infected, their infection time was recorded and the symptom onset time was determined using the distribution of the incubation period.

50 datasets were simulated according to the procedure described above using the median of posterior distribution inferred by the main model, and the model was then inferred on these 50 simulated datasets to provide 50 estimated 95% credible intervals for parameters. Then, the proportion of credible intervals covering the actual values used to simulate these datasets was calculated, and the model could be assessed as well validated if this proportion of coverage was close to 95%.

# Model adequacy

We simulated 10,000 datasets using the posterior distribution inferred by the main model to predict the expected numbers of infections found in households with different sizes. 95% credible intervals of expected numbers were calculated and compared with the observation. The model could be assessed as adequate if the observed values were all contained by the predicted credible intervals.

# References

1. Ip DK, Schutten M, Fang VJ, et al. Validation of self-swab for virologic confirmation of influenza virus infections in a community setting. J Infect Dis 2012; 205:631-4.

2. Lau LL, Ip DK, Nishiura H, et al. Heterogeneity in viral shedding among individuals with medically attended influenza A virus infection. J Infect Dis 2013; 207:1281-5.

3. Tsang TK, Cowling BJ, Fang VJ, et al. Influenza A Virus Shedding and Infectivity in Households. J Infect Dis 2015; 212:1420-8.

4. Vaida F, Liu L. Fast Implementation for Normal Mixed Effects Models With Censored Response. J Comput Graph Stat 2009; 18:797-817.

5. Zhang C, Fang VJ, Chan KH, et al. Interplay between viral shedding, age, and symptoms on individual infectiousness of influenza cases in households. J Infect Dis 2024.

6. Lau LL, Cowling BJ, Fang VJ, et al. Viral shedding and clinical illness in naturally acquired influenza virus infections. J Infect Dis 2010; 201:1509-16.

7. Cauchemez S, Donnelly CA, Reed C, et al. Household transmission of 2009 pandemic influenza A (H1N1) virus in the United States. N Engl J Med 2009; 361:2619-27.

8. Tsang TK, Cauchemez S, Perera RA, et al. Association between antibody titers and protection against influenza virus infection within households. J Infect Dis 2014; 210:684-92.

9. Tsang TK, Huang X, Wang C, et al. The effect of variation of individual infectiousness on SARS-CoV-2 transmission in households. eLife 2023; 12:e82611.

10. Lessler J, Reich NG, Brookmeyer R, Perl TM, Nelson KE, Cummings DA. Incubation periods of acute respiratory viral infections: a systematic review. Lancet Infect Dis 2009; 9:291-300.

11. Xiong W, Peng L, Tsang TK, Cowling BJ. Epidemiology of SARS-CoV-2 Omicron BA.5 Infections, Macau, June-July 2022. Emerg Infect Dis 2023; 29:453-6.

12. Tsang TK, Fang VJ, Chan K-H, et al. Individual Correlates of Infectivity of Influenza A Virus Infections in Households. PLOS ONE 2016; 11:e0154418.

13. Wu P, Goldstein E, Ho LM, et al. Excess mortality associated with influenza A and B virus in Hong Kong, 1998-2009. J Infect Dis 2012; 206:1862-71.

14. Spiegelhalter DJ, Best NG, Carlin BP, Van Der Linde A. Bayesian measures of model complexity and fit. Journal of the Royal Statistical Society Series B: Statistical Methodology 2002; 64:583-639.

# Appendix figure legends

**Appendix Figure 1:** A – B: Observed viral load for influenza A and B cases on different days after symptom onset; C – D: Predicted complete viral shedding trajectories for influenza A and B cases after symptom onset.

**Appendix Figure 2:** DIC values of influenza A, influenza B and SARS-CoV-2 models assuming Gamma-distributed infectiousness profile, and adopting different shifts and therefore different starting dates of infectiousness. The model with the lowest DIC was selected as the main model, and models with DIC values higher than the lowest DIC plus 5 (the dashed line) had a substantial difference in the goodness-of-fit from the main model.

**Appendix Figure 3:** A – C: DIC values of influenza A, influenza B and SARS-CoV-2 models assuming Poisson-distributed infectiousness profile, and adopting different shifts and therefore different starting dates of infectiousness. The black dashed line marked the lowest DIC value plus 5, indicating the substantial difference in the goodness-of-fit, and the red dashed line was the DIC value of the main model using Gamma infectiousness; D: DIC values of influenza B models assuming Gamma-distributed infectiousness profile, using the incubation period of influenza A (median 1.4 days) as a sensitivity analysis, and adopting different shifts and therefore different starting dates of infectiousness. The black dashed line marked the lowest DIC value plus 5, indicating the substantial difference in the goodness-of-fit.

**Appendix Figure 4:** A: Proportions of pre-symptomatic transmission of influenza A estimated by model adopting Gamma and Poisson-distributed infectiousness profile; B: Proportions of pre-symptomatic transmission of SARS-CoV-2 estimated by model adopting Gamma and Poisson-distributed infectiousness profile; C: Proportions of pre-symptomatic transmission of influenza A estimated by models adopting Gamma-distributed infectiousness profiles and probability thresholds varying from 0.005 to 0.00001 as the sensitivity analysis; D: Proportions of pre-symptomatic transmission of SARS-CoV-2 estimated by models adopting Gamma-distributed infectiousness profiles and probability thresholds varying from 0.005 to 0.00001 as the sensitivity analysis.

**Appendix Figure 5:** Comparison of effects of covariates affecting influenza A transmission, estimated by models adopting Gamma-distributed infectiousness profiles and assuming different infectiousness starting days. Day 0 was the day of symptom onset.

**Appendix Figure 6:** Comparison of effects of covariates affecting influenza A transmission, estimated by models adopting Gamma or Poisson-distributed infectiousness profiles and different infectiousness starting dates. Day 0 was the day of symptom onset.

**Appendix Figure 7:** Comparison of effects of covariates affecting influenza A transmission, estimated by models adopting Gamma-distributed infectiousness profiles and assuming infections began 5 days before symptom onset, adopting probability threshold varying from 0.005 to 0.00001 as the sensitivity analysis.

**Appendix Figure 8:** Comparison of effects of covariates affecting influenza B transmission, estimated by models adopting Gamma-distributed infectiousness profiles and assuming different infectiousness starting days. Day 0 was the day of symptom onset.

**Appendix Figure 9:** Comparison of effects of covariates affecting influenza B transmission, estimated by models adopting Gamma or Poisson-distributed infectiousness profiles and different infectiousness starting dates. Day 0 was the day of symptom onset.

**Appendix Figure 10:** Comparison of effects of covariates affecting influenza B transmission, estimated by models adopting Gamma-distributed infectiousness profiles and assuming infections began at symptom onset, adopting probability threshold varying from 0.005 to 0.00001 as the sensitivity analysis.

**Appendix Figure 11:** Comparison of effects of covariates affecting influenza B transmission, estimated by models adopting Gamma-distributed infectiousness profiles and assuming infections began at symptom onset, adopting the incubation period of influenza A (median 1.4 days) as the sensitivity analysis.

**Appendix Figure 12:** Comparison of effects of covariates affecting SARS-CoV-2 transmission, estimated by models adopting Gamma-distributed infectiousness profiles and assuming different infectiousness starting days. Day 0 was the day of symptom onset.

**Appendix Figure 13:** Comparison of effects of covariates affecting SARS-CoV-2 transmission, estimated by models adopting Gamma or Poisson-distributed infectiousness profiles and different infectiousness starting dates. Day 0 was the day of symptom onset.

**Appendix Figure 14:** Comparison of effects of covariates affecting SARS-CoV-2 transmission, estimated by models adopting Gamma-distributed infectiousness profiles and assuming infections began 6 days before symptom onset, adopting probability threshold varying from 0.005 to 0.00001 as the sensitivity analysis.

Appendix Table 1: Summary of influenza A data. Co-index members were defined as infected household members who were not index cases but also had positive results in the first PCR test.

| **Characteristics** | **Virus Subtypes** | | | | | | **p-value** | |
| --- | --- | --- | --- | --- | --- | --- | --- | --- |
| **Seasonal A(H1N1)** | **Seasonal A(H3N2)** | | | **Pandemic A(H1N1)** | |  | |
| ***Index cases*** |  |  | | |  | |  | |
| **Number of cases** | 170 | 211 | | | 112 | |  | |
| **Mean (Range) of observed viral shedding (copies/mL) at PCR tests** | | |  |  | | |  | |
| **Test at symptom onset** | 7.38 (5.01, 9.41) | 7.01 (3.56, 9.49) | | | 6.29 (4.00, 7.76) | | 0.345 | |
| **Test 1 day after symptom onset** | 6.60 (3.42, 9.32) | 6.76 (4.12, 9.62) | | | 6.27 (3.12, 8.57) | | 0.053 | |
| **Test 2 days after symptom onset** | 6.31 (3.38, 8.88) | 5.96 (3.31, 9.36) | | | 5.45 (3.16, 7.37) | | 0.010 | |
| **Mean (Range) of predicted viral shedding (copies/mL) at symptom onset** | 6.70 (4.85, 8.38) | 6.57 (5.05, 8.65) | | | 6.36 (5.05, 8.15) | | <0.001 | |
| **Age** |  |  | | |  | |  | |
| **Mean (range)** | 14 (1, 72) | 19 (2, 81) | | | 16 (2, 61) | | 0.170 | |
| **Pre-school children (** **5 years)** | 33 (19%) | 43 (20%) | | | 25 (22%) | |  | |
| **School-age children (6 – 17 years)** | 101 (59%) | 99 (47%) | | | 53 (47%) | |  | |
| **Adults (18 – 50 years)** | 29 (17%) | 51 (24%) | | | 30 (27%) | |  | |
| **Old ( 50 years)** | 7 (4%) | 18 (9%) | | | 4 (4%) | | 0.084 | |
| **Vaccination** | 22 (13%) | 42 (20%) | | | 14 (13%) | | 0.109 | |
| **Antiviral** | 68 (40%) | 117 (55%) | | | 66 (59%) | | 0.002 | |
| **Fever** | 121 (71%) | 152 (72%) | | | 78 (70%) | | 0.895 | |
| **Number of household contacts** |  |  | | |  | |  | |
| **2** | 57 (34%) | 75 (36%) | | | 37 (33%) | |  | |
| **3** | 71 (42%) | 89 (42%) | | | 48 (43%) | |  | |
| **4** | 31 (18%) | 41 (19%) | | | 22 (20%) | |  | |
| **5** | 8 (5%) | 6 (3%) | | | 5 (4%) | |  | |
| **6** | 3 (2%) | 0 (0%) | | | 0 (0%) | | 0.724 | |
| **Total number of contacts** | 509 | 611 | | | 331 | |  | |
| **Total number of contacts (Co-index excluded)** | 483 | 574 | | | 314 | |  | |
| ***Infected contacts*** |  |  | | |  | |  | |
| **Total number (Overall secondary infection risk)** | 94 (18%) | 126 (21%) | | | 53 (16%) | | 0.221 | |
| **Mean (Range) of observed viral shedding (copies/mL) at PCR tests** | | | | | | |  | |
| **Test at symptom onset** | 6.01 (3.66, 8.50) | 5.64 (3.32, 9.49) | | | 4,73 (3.04, 6.66) | | 0.043 | |
| **Test 1 day after symptom onset** | 5.67 (3.32, 7.79) | 6.27 (3.70, 8.57) | | | 4.75 (3.11, 6.22) | | 0.028 | |
| **Test 2 days after symptom onset** | 5,64 (3.43, 8.83) | 5.32 (3.09, 7.77) | | | 5.79 (4.22, 7.94) | | 0.567 | |
| **Mean (Range) of predicted viral shedding (copies/mL) at symptom onset** | 5.95 (4.29, 7.60) | 5.82 (4.66, 7.85) | | | 5.61 (4.75, 6.67) | | 0.001 | |
| **Age** |  |  | | |  | |  | |
| **Mean (range)** | 29 (1, 57) | 31 (0, 91) | | | 30 (2, 59) | | 0.716 | |
| **Pre-school children (** **5 years)** | 13 (14%) | 9 (7%) | | | 9 (17%) | |  | |
| **School-age children (6 – 17 years)** | 15 (16%) | 31 (25%) | | | 4 (8%) | |  | |
| **Adults (18 – 50 years)** | 63 (67%) | 76 (60%) | | | 37 (70%) | |  | |
| **Old ( 50 years)** | 3 (3%) | 10 (8%) | | | 3 (6%) | | 0.034 | |
| **Vaccination** | 2 (2%) | 25 (20%) | | | 7 (13%) | | <0.001 | |
| **Antiviral** | 21 (22%) | 70 (56%) | | | 32 (60%) | | <0.001 | |
| **Fever** | 41 (44%) | 53 (42%) | | | 23 (43%) | | 0.974 | |
| ***Infected contacts (Co-Index excluded)*** |  |  | | |  | |  | |
| **Total number (Overall secondary infection risk)** | 68 (14%) | 89 (16%) | | | 36 (11%) | | 0.254 | |
| **Mean (Range) of observed viral shedding (copies/mL) at PCR tests** | | | | |  |  | |  |
| **Test at symptom onset** | 6.00 (3.66, 8.50) | 5.82 (3.36, 9.49) | | | 4.45 (3.93, 4.97) | | 0.413 | |
| **Test 1 day after symptom onset** | 5.58 (3.32, 7.79) | 6.27 (3.70, 8.57) | | | 4.84 (3.11, 6.22) | | 0.037 | |
| **Test 2 days after symptom onset** | 5.44 (3.43, 8.83) | 5.06 (3.09, 7.77) | | | 6.02 (4.43, 7.94) | | 0.314 | |
| **Mean (Range) of predicted viral shedding (copies/mL) at symptom onset** | 5.91 (5.07, 7.18) | 5.78 (4.66, 7.20) | | | 5.65 (4.87, 6.27) | | 0.022 | |
| **Age** |  |  | | |  | |  | |
| **Mean (range)** | 31 (1, 54) | 34 (0, 91) | | | 33 (2, 59) | | 0.818 | |
| **Pre-school children (** **5 years)** | 9 (13%) | 4 (4%) | | | 5 (14%) | |  | |
| **School-age children (6 – 17 years)** | 6 (9%) | 15 (17%) | | | 1 (3%) | |  | |
| **Adults (18 – 50 years)** | 51 (75%) | 63 (71%) | | | 27 (75%) | |  | |
| **Old ( 50 years)** | 2 (3%) | 7 (8%) | | | 3 (8%) | | 0.064 | |
| **Vaccination** | 2 (3%) | 14 (16%) | | | 3 (8%) | | 0.020 | |
| **Antiviral** | 17 (25%) | 51 (57%) | | | 20 (56%) | | <0.001 | |
| **Fever** | 28 (41%) | 40 (45%) | | | 12 (33%) | | 0.520 | |
| ***Uninfected contacts*** |  |  | | |  | |  | |
| **Number of uninfected contacts** | 415 | 485 | | | 278 | |  | |
| **Age** |  |  | | |  | |  | |
| **Mean (range)** | 38 (1, 90) | 37 (0, 97) | | | 38 (1, 86) | | 0.603 | |
| **Pre-school children (** **5 years)** | 15 (4%) | 16 (3%) | | | 7 (3%) | |  | |
| **School-age children (6 – 17 years)** | 48 (12%) | 57 (12%) | | | 37 (13%) | |  | |
| **Adults (18 – 50 years)** | 275 (66%) | 330 (68%) | | | 179 (64%) | |  | |
| **Old ( 50 years)** | 77 (19%) | 82 (17%) | | | 55 (20%) | | 0.888 | |
| **Vaccination** | 50 (12%) | 57 (12%) | | | 26 (9%) | | 0.502 | |

Appendix Table 2: Summary of influenza B data. Co-index members were defined as infected household members who were not index cases but also had positive results in the first PCR test.

| **Characteristics** | **Virus Subtypes** | | | | | | **p-value** | |
| --- | --- | --- | --- | --- | --- | --- | --- | --- |
| **B/Victoria** | **B/Yamagata** | | | **Unsubtypable** | |  | |
| ***Index cases*** |  |  | | |  | |  | |
| **Number of cases** | 44 | 71 | | | 140 | |  | |
| **Mean (Range) of observed viral shedding (copies/mL) at PCR tests** | | |  |  | | |  | |
| **Test at symptom onset** | 7.54 (6.58, 8.69) | 7.50 (6.25, 8.32) | | | 7.62 (5.20, 9.20) | | 0.893 | |
| **Test 1 day after symptom onset** | 6.45 (4.20, 8.98) | 7.09 (4.12, 9.63) | | | 6.81 (3.11, 9.51) | | 0.094 | |
| **Test 2 days after symptom onset** | 6.91 (5.30, 8.15) | 6.38 (3.23, 7.48) | | | 6.12 (3.66, 8.56) | | 0.047 | |
| **Mean (Range) of predicted viral shedding (copies/mL) at symptom onset** | 7.07 (6.23, 7.93) | 7.02 (6.25, 7.55) | | | 6.99 (5.95, 7.64) | | 0.678 | |
| **Age** |  |  | | |  | |  | |
| **Mean (range)** | 12 (2, 56) | 15 (2, 55) | | | 16 (0, 79) | | 0.853 | |
| **Pre-school children (** **5 years)** | 6 (14%) | 11 (15%) | | | 29 (21%) | |  | |
| **School-age children (6 – 17 years)** | 31 (70%) | 40 (56%) | | | 74 (53%) | |  | |
| **Adults (18 – 50 years)** | 6 (14%) | 19 (27%) | | | 32 (23%) | |  | |
| **Old ( 50 years)** | 1 (2%) | 1 (1%) | | | 5 (4%) | | 0.443 | |
| **Vaccination** | 6 (14%) | 8 (11%) | | | 19 (14%) | | 0.904 | |
| **Antiviral** | 18 (41%) | 30 (42%) | | | 46 (33%) | | 0.334 | |
| **Fever** | 31 (70%) | 51 (72%) | | | 79 (56%) | | 0.052 | |
| **Number of household contacts** |  |  | | |  | |  | |
| **2** | 17 (39%) | 24 (34%) | | | 46 (33%) | |  | |
| **3** | 11 (25%) | 25 (35%) | | | 45 (32%) | |  | |
| **4** | 12 (27%) | 14 (20%) | | | 38 (27%) | |  | |
| **5** | 2 (5%) | 6 (8%) | | | 10 (7%) | |  | |
| **6** | 2 (5%) | 0 (0%) | | | 1 (1%) | |  | |
| **7** | 0 (0%) | 2 (3%) | | | 0 (0%) | | 0.344 | |
| **Total number of contacts** | 137 | 223 | | | 435 | |  | |
| **Total number of contacts (Co-index excluded)** | 127 | 214 | | | 416 | |  | |
| ***Infected contacts*** |  |  | | |  | |  | |
| **Total number (Overall secondary infection risk)** | 22 (16%) | 36 (16%) | | | 37 (9%) | | 0.004 | |
| **Mean (Range) of observed viral shedding (copies/mL) at PCR tests** | | | | | | |  | |
| **Test at symptom onset** | 5.98 (4.57, 7.27) | 5.93 (3.37, 8.47) | | | 5.94 (3.77, 8.42) | | 0.995 | |
| **Test 1 day after symptom onset** | 4.89 (4.40, 5.42) | 5.57 (3.71, 7.38) | | | 4.81 (3.57, 6.16) | | 0.584 | |
| **Test 2 days after symptom onset** | 6.95 (5.76, 8.13) | 5.25 (3.62, 6.72) | | | 3.58 (2.97, 4.02) | | 0.089 | |
| **Mean (Range) of predicted viral shedding (copies/mL) at symptom onset** | 5.79 (4.90, 6.47) | 5.66 (4.87, 6.67) | | | 5.80 (4.92, 6.48) | | 0.258 | |
| **Age** |  |  | | |  | |  | |
| **Mean (range)** | 22 (2, 51) | 32 (3, 71) | | | 26 (2, 72) | | 0.169 | |
| **Pre-school children (** **5 years)** | 3 (14%) | 2 (6%) | | | 5 (14%) | |  | |
| **School-age children (6 – 17 years)** | 8 (36%) | 9 (25%) | | | 12 (32%) | |  | |
| **Adults (18 – 50 years)** | 10 (45%) | 21 (58%) | | | 18 (49%) | |  | |
| **Old ( 50 years)** | 1 (5%) | 4 (11%) | | | 2 (5%) | | 0.737 | |
| **Vaccination** | 1 (5%) | 1 (3%) | | | 5 (14%) | | 0.213 | |
| **Antiviral** | 9 (41%) | 19 (53%) | | | 8 (22%) | | 0.023 | |
| **Fever** | 12 (55%) | 12 (33%) | | | 18 (49%) | | 0.235 | |
| ***Infected contacts (Co-Index excluded)*** |  |  | | |  | |  | |
| **Total number (Overall secondary infection risk)** | 12 (9%) | 27 (13%) | | | 18 (4%) | | 0.001 | |
| **Mean (Range) of observed viral shedding (copies/mL) at PCR tests** | | | | |  |  | |  |
| **Test at symptom onset** | 6.95 (6.95, 6.95) | 6.52 (4.11, 8.47) | | | - | | - | |
| **Test 1 day after symptom onset** | 4.89 (4.40, 5.42) | 5.57 (3.71, 7.38) | | | 4.81 (3.57, 6.16) | | 0.584 | |
| **Test 2 days after symptom onset** | 5.76 (5.76, 5.76) | 5.46 (3.62, 6.72) | | | 3.49 (2.97, 4.02) | | 0.213 | |
| **Mean (Range) of predicted viral shedding (copies/mL) at symptom onset** | 5.59 (4.90, 6.29) | 5.70 (4.97, 6.67) | | | 5.67 (4.92, 6.48) | | 0.857 | |
| **Age** |  |  | | |  | |  | |
| **Mean (range)** | 27 (2, 51) | 31 (8, 63) | | | 27 (2, 50) | | 0.623 | |
| **Pre-school children (** **5 years)** | 1 (8%) | 0 (0%) | | | 2 (11%) | |  | |
| **School-age children (6 – 17 years)** | 3 (25%) | 8 (30%) | | | 5 (28%) | |  | |
| **Adults (18 – 50 years)** | 7 (58%) | 17 (63%) | | | 11 (61%) | |  | |
| **Old ( 50 years)** | 1 (8%) | 2 (7%) | | | 0 (0%) | | 0.582 | |
| **Vaccination** | 1 (8%) | 1 (4%) | | | 2 (11%) | | 0.539 | |
| **Antiviral** | 5 (42%) | 15 (56%) | | | 4 (22%) | | 0.077 | |
| **Fever** | 6 (50%) | 8 (30%) | | | 9 (50%) | | 0.298 | |
| ***Uninfected contacts*** |  |  | | |  | |  | |
| **Number of uninfected contacts** | 115 | 187 | | | 398 | |  | |
| **Age** |  |  | | |  | |  | |
| **Mean (range)** | 37 (1, 78) | 39 (1, 81) | | | 37 (0, 90) | | 0.417 | |
| **Pre-school children (** **5 years)** | 2 (2%) | 8 (4%) | | | 23 (6%) | |  | |
| **School-age children (6 – 17 years)** | 12 (10%) | 23 (12%) | | | 49 (12%) | |  | |
| **Adults (18 – 50 years)** | 89 (77%) | 121 (65%) | | | 254 (64%) | |  | |
| **Old ( 50 years)** | 12 (10%) | 35 (19%) | | | 72 (18%) | | 0.144 | |
| **Vaccination** | 11 (10%) | 26 (14%) | | | 56 (14%) | | 0.457 | |

Appendix Table 3: The linear model of influenza viral shedding trajectories, for children and adults respectively

| **Influenza A Viral Shedding Model** | **Change in viral load (95% CI) copies/mL** | | **p-value** |
| --- | --- | --- | --- |
| **Children** | **Adults** |
| **Being the index case in households** | 0.46 (0.13, 0.78) | 0.70 (0.38, 1.03) | 0.295 |
| **Days after infection before symptom onset** | 0.76 (0.17, 1.35) | 0.70 (0.28, 1.12) | 0.871 |
| **Days after symptom onset** | -0.36 (-0.39, -0.32) | -0.45 (-0.53, -0.37) | 0.030 |
| **Intercept fixed effect** | 6.17 (5.86, 6.48) | 5.67 (5.39, 5.96) | 0.021 |
| **Intercept random effect standard deviation** | 0.96 | 0.71 |  |
| **Influenza B Viral Shedding Model** | **Change in viral load (95% CI) copies/mL** | | **p-value** |
| **Children** | **Adults** |
| **Being the index case in households** | 0.95 (0.52, 1.38) | 1.24 (0.69, 1.80) | 0.418 |
| **Days after infection before symptom onset** | 0.55 (-0.13, 1.23) | 0.17 (-0.38, 0.72) | 0.390 |
| **Days after symptom onset** | -0.42 (-0.48. -0.37) | -0.35 (-0.46, -0.23) | 0.228 |
| **Intercept fixed effect** | 6.17 (5.74, 6.59) | 5.44 (4.96, 5.92) | 0.026 |
| **Intercept random effect standard deviation** | 0.53 | 0.70 |  |

Appendix Table 4: Mean and standard deviation of the predicted viral load at symptom onset for all influenza cases

|  | **Influenza A** | **Influenza B** |
| --- | --- | --- |
| **Mean ()** | 6.297 | 6.678 |
| **Standard Deviation** | 0.686 | 0.672 |

Appendix Table 5: Interdependency between age, fever and viral shedding in influenza A data

| **Characteristics** | **Age 6 years** | **Age 6 – 17 years** | | **Age 18 years** | **p-value** |
| --- | --- | --- | --- | --- | --- |
| **Number of infected members** | 132 | 303 | | 331 |  |
| **Mean (range) of predicted viral load () at symptom onset** | 6.55 (4.87, 8.29) | 6.55 (4.29, 8.65) | | 5.97 (4.83, 7.39) | <0.001 |
| **Fever** | 109 (83%) | 215 (71%) | | 144 (44%) |  |
| **No Fever** | 23 (17%) | 88 (29%) | | 187 (56%) | <0.001 |
| **Characteristics** | **Fever** | | **No Fever** | | **p-value** |
| **Number of infected members** | 468 | | 298 | |  |
| **Mean (range) of predicted viral load () at symptom onset** | 6.44 (4.66, 8.65) | | 6.08 (4.29, 8.55) | | <0.001 |

Appendix Table 6: Interdependency between age, fever and viral shedding in influenza B data

| **Characteristics** | **Age 6 years** | **Age 6 – 17 years** | | **Age 18 years** | **p-value** |
| --- | --- | --- | --- | --- | --- |
| **Number of infected members** | 56 | 174 | | 120 |  |
| **Mean (range) of predicted viral load () at symptom onset** | 6.97 (5.77, 7.59) | 6.96 (5.57, 7.93) | | 6.12 (4.87, 7.52) | <0.001 |
| **Fever** | 47 (84%) | 113 (65%) | | 43 (36%) |  |
| **No Fever** | 9 (16%) | 61 (35%) | | 77 (64%) | <0.001 |
| **Characteristics** | **Fever** | | **No Fever** | | **p-value** |
| **Number of infected members** | 203 | | 147 | |  |
| **Mean (range) of predicted viral load () at symptom onset** | 6.83 (4.97, 7.93) | | 6.47 (4.87, 7.55) | | <0.001 |

Appendix Table 7: Comparison of influenza A model using Gamma-distributed infectiousness profile with different shifts, from 0 to 4 days before symptom onset, including means and variances of infectiousness profiles given that the incubation was 5 days, proportions of pre-symptomatic transmission and the DIC values. Model assuming transmission starting 4 days before symptom onset had the best goodness-of-fit.

| **Infection Starting Day Before Symptom Onset** | **Mean (Days After Symptom Onset)** | **Variance** | **Proportion of Pre-symptomatic Transmission** | **DIC** |
| --- | --- | --- | --- | --- |
| **4** | 0.49 (-0.22, 0.87) | 2.28 (1.57, 3.49) | 9.61% (5.89%, 14.73%) | reference |
| **2** | 0.63 (0.16, 0.94) | 2.04 (1.46, 3.05) | 8.75% (5.23%, 13.83%) | 0.328 |
| **3** | 0.57 (0.02, 0.89) | 2.15 (1.48, 3.25) | 9.13% (5.61%, 13.96%) | 0.334 |
| **1** | 0.73 (0.38, 1.00) | 1.93 (1.39, 2.82) | 7.88% (4.45%, 12.73%) | 0.417 |
| **0** | 0.86 (0.47, 1.13) | 1.63 (1.03, 2.67) | 0 | 31.873 |

Appendix Table 8: Influenza A models with different combinations of age, viral load and fever covariates as factors affecting individual infectiousness.

|  | **Risk Ratio: Effects on Infectiousness** | | | |  |
| --- | --- | --- | --- | --- | --- |
| **Model (Combinations of Age, Viral Load and Fever)** | **Pre-School Children (Age ) vs. Adults** | **School-Age Children (Age ) vs. Adults** | **Standardized Predicted Viral Load at Symptom Onset** | **Fever Symptoms** | **DIC** |
| **Age + Viral Load + Fever** | 2.72 (1.78, 4.20) | 1.56 (1.07, 2.32) | 1.19 (1.02, 1.37) | 1.81 (1.28, 2.56) | reference |
| **Age + Fever** | 2.98 (1.99, 4.60) | 1.71 (1.18, 2.54) | - | 1.89 (1.36, 2.76) | 4.363 |
| **Age + Viral Load** | 3.11 (2.08, 4.66) | 1.72 (1.18, 2.50) | 1.22 (1.06, 1.40) | - | 11.106 |
| **Age Only** | 3.33 (2.19, 5.09) | 1.85 (1.26, 2.75) | - | - | 17.230 |
| **Viral Load + Fever** | - | - | 1.25 (1.09, 1.45) | 2.04 (1.43, 2.99) | 21.053 |
| **Fever Only** | - | - | - | 2.13 (1.51, 3.07) | 29.955 |
| **Viral Load Only** | - | - | 1.31 (1.14, 1.51) | - | 38.266 |

Appendix Table 9: Adequacy assessment for the influenza A model, with a Gamma infectiousness profile and infections starting 4 days before symptom onset: Observed – Estimated (95% CI) numbers of infected household contacts by household sizes.

|  | **Number of Infected Members** | | | | | | |
| --- | --- | --- | --- | --- | --- | --- | --- |
| **Household Size** | **1** | **2** | **3** | **4** | **5** | **6** | **7** |
| **3** | 117-118 (103, 132) | 40-41 (29, 53) | 12-10 (4, 18) | - | - | - | - |
| **4** | 126-132 (117, 147) | 63-53 (41, 66) | 15-18 (11, 28) | 4-4 (1, 8) | - | - | - |
| **5** | 43-49 (39, 59) | 33-25 (17, 34) | 11-13 (7, 20) | 5-5 (1, 10) | 2-1 (0, 4) | - | - |
| **6** | 8-9 (4, 13) | 3-5 (2,9) | 4-3 (0, 6) | 3-1 (0, 4) | 1-0 (0, 2) | 0-0 (0, 1) | - |
| **7** | 1-1 (0, 3) | 2-1 (0, 2) | 0-1 (0, 2) | 0-0 (0, 2) | 0-0 (0, 1) | 0-0 (0, 1) | 0-0 (0, 0) |

Appendix Table 10: Simulation assessment for the influenza A main model, with a Gamma infectiousness profile and infections starting 4 days before symptom onset. Mean baseline transmission probability from the community was calculated based on the mean value of influenza activities during the study period.

| **Parameters** | **Actual Values** | **Mean Estimates** | **Proportion of Coverage** |
| --- | --- | --- | --- |
| **Mean of Gamma infectiousness profile** | 5.494 | 5.328 | 92% |
| **Variance of Gamma infectiousness profile** | 2.281 | 2.310 | 100% |
| **: Mean baseline transmission probability from community** | 0.0001 | 0.0004 | 78% |
| **: Baseline transmission probability within households** | 0.074 | 0.082 | 88% |
| **: Susceptibility age vs. age** | 1.283 | 1.326 | 88% |
| **: Susceptibility age vs. age** | 0.718 | 0.695 | 94% |
| **: Susceptibility age vs. age** | -0.759 | -0.914 | 94% |
| **: Susceptibility vaccination** | 0.063 | 0.031 | 98% |
| **: Infectiousness age vs. age** | 1.002 | 0.955 | 98% |
| **: Infectiousness age vs. age** | 0.447 | 0.395 | 94% |
| **: Infectiousness viral load at symptom onset** | 0.171 | 0.169 | 92% |
| **: Infectiousness fever** | 0.592 | 0.489 | 88% |
| **: Infectiousness antiviral** | -0.278 | -0.254 | 96% |
| **: Infectiousness A(H1N1)pdm vs. A(H1N1)** | -0.017 | -0.056 | 96% |
| **: Infectiousness A(H3N2) vs. A(H1N1)** | 0.206 | 0.177 | 90% |
| **: Infectiousness household size vs. size** | -0.442 | -0.474 | 96% |
| **: Infectiousness household size vs. size** | -0.542 | -0.574 | 94% |

Appendix Table 11: Comparison of influenza A model using Poisson-distributed infectiousness profile with different shifts, from 0 to 4 days before symptom onset, with the main model, namely the model with a Gamma infectiousness profile and infections starting 4 days before symptom onset, including means infectiousness profiles given that the incubation was 5 days, proportions of pre-symptomatic transmission and the DIC values.

| **Infectious Profile Distribution** | **Infection Starting Day Before Symptom Onset** | **Mean (Days After Symptom Onset)** | **Variance** | **Proportion of Pre-symptomatic Transmission** | **DIC** |
| --- | --- | --- | --- | --- | --- |
| **Gamma** | **4 (Main Model)** | 0.49 (-0.22, 0.87) | 2.28 (1.57, 3.49) | 9.61% (5.89%, 14.73%) | reference |
| **Poisson** | **1** | 0.43 (0.15, 0.73) | - | 10.22% (8.30%, 12.35%) | -2.012 |
| **Poisson** | **2** | 0.09 (-0.27, 0.44) | - | 12.50% (10.33%, 15.00%) | 0.425 |
| **Poisson** | **3** | -0.28 (-0.70, 0.11) | - | 13.76% (11.60%, 16.34%) | 2.673 |
| **Poisson** | **4** | -0.68 (-1.14, -0.20) | - | 14.73% (12.36%, 17.29%) | 4.061 |
| **Poisson** | **0** | 0.65 (0.38, 0.93) | - | 0 | 29.421 |

Appendix Table 12: Sensitivity analysis: Estimates of proportions of pre-symptomatic transmission of influenza A virus, using the probability threshold ranging from 0.5% to 0.001%, assuming transmission started 4 days before symptom onset.

| **Probability Threshold** | **Proportion of Pre-symptomatic Transmission** |
| --- | --- |
| **0.005** | 9.43% (5.81%, 14.14%) |
| **0.001** | 9.59% (5.94%, 14.67%) |
| **0.0005** | 9.61% (5.91%, 14.46%) |
| **0.0001** | 9.61% (5.89%, 14.73%) |
| **0.00005** | 9.60% (6.00%, 14.41%) |
| **0.00001** | 9.64% (5.88%, 14.75%) |

Appendix Table 13: Comparison of influenza B model using Gamma-distributed infectiousness profile with different shifts, from 0 to 4 days before symptom onset, including means and variances of infectiousness profiles given that the incubation was 5 days, proportions of pre-symptomatic transmission and the DIC values.

| **Infection Starting Day Before Symptom Onset** | **Mean (Days After Symptom Onset)** | **Variance** | **Proportion of Pre-symptomatic Transmission** | **DIC** |
| --- | --- | --- | --- | --- |
| **0** | 1.41 (0.84, 2.06) | 2.70 (1.08, 8.79) | 0 | reference |
| **2** | 0.76 (-1.68, 1.56) | 3.70 (1.42, 8.70) | 0.42% (0.11%, 0.78%) | -0.729 |
| **3** | 0.50 (-2.72, 1.44) | 3.97 (1.57, 8.71) | 0.46% (0.15%, 0.78%) | -0.601 |
| **1** | 1.07 (-0.54, 1.76) | 3.49 (1.34, 9.94) | 0.35% (0.08%, 0.83%) | -0.597 |
| **4** | 0.30 (-3.13, 1.38) | 4.32 (1.68, 9.00) | 0.47% (0.17%, 0.76%) | -0.070 |

Appendix Table 14: Influenza B models with different combinations of age, viral load and fever covariates as factors affecting individual infectiousness.

|  | **Risk Ratio: Effects on Infectiousness** | | | |  |
| --- | --- | --- | --- | --- | --- |
| **Model (Combinations of Age, Viral Load and Fever)** | **Pre-School Children (Age ) vs. Adults** | **School-Age Children (Age ) vs. Adults** | **Standardized Predicted Viral Load at Symptom Onset** | **Fever Symptoms** | **DIC** |
| **Age Only** | 3.48 (1.68, 7.96) | 1.62 (0.84, 3.48) | - | - | reference |
| **Age + Fever** | 2.95 (1.36, 7.21) | 1.44 (0.75, 3.28) | - | 1.37 (0.78, 2.67) | 1.599 |
| **Age + Viral Load** | 2.74 (1.17, 7.48) | 1.30 (0.59, 3.22) | 1.20 (0.81, 1.90) | - | 2.121 |
| **Age + Viral Load + Fever** | 2.55 (0.99, 7.90) | 1.24 (0.55, 3.34) | 1.18 (0.78, 1.91) | 1.36 (0.76, 2.75) | 3.275 |
| **Viral Load + Fever** | - | - | 1.34 (0.95, 1.98) | 1.56 (0.90, 3.14) | 5.712 |
| **Viral Load Only** | - | - | 1.40 (1.02, 2.04) | - | 5.935 |
| **Fever Only** | - | - | - | 1.73 (0.98, 3.54) | 6.317 |

Appendix Table 15: Adequacy assessment for the influenza B model, with a Gamma infectiousness profile and infections starting at symptom onset: Observed – Estimated (95% CI) numbers of infected household contacts by household sizes.

|  | **Number of Infected Members** | | | | | | | |
| --- | --- | --- | --- | --- | --- | --- | --- | --- |
| **Household Size** | **1** | **2** | **3** | **4** | **5** | **6** | **7** | **8** |
| **3** | 67-69 (58, 77) | 19-16 (8, 24) | 1-3 (0, 7) | - | - | - | - | - |
| **4** | 59-59 (49, 67) | 17-18 (11, 26) | 3-4 (1, 9) | 2-0 (0, 3) | - | - | - | - |
| **5** | 38-40 (32, 48) | 20-16 (9, 24) | 6-6 (2, 11) | 0-1 (0, 5) | 0-0 (0, 2) | - | - | - |
| **6** | 13-12 (7, 16) | 4-4 (1, 8) | 1-1 (0, 4) | 0-0 (0, 2) | 0-0 (0, 1) | 0-0 (0, 0) | - | - |
| **7** | 0-2 (0, 3) | 0-1 (0, 2) | 2-0 (0, 2) | 1-0 (0, 1) | 0-0 (0, 1) | 0-0 (0, 1) | 0-0 (0, 0) | - |
| **8** | 2-1 (0, 2) | 0-0 (0, 2) | 0-0 (0, 1) | 0-0 (0, 1) | 0-0 (0, 1) | 0-0 (0, 1) | 0-0 (0, 0) | 0-0 (0, 0) |

Appendix Table 16: Simulation assessment for the influenza B main model, with a Gamma infectiousness profile and infections starting at symptom onset.

| **Parameters** | **Actual Values** | **Mean Estimates** | **Proportion of Coverage** |
| --- | --- | --- | --- |
| **Mean of Gamma infectiousness profile** | 2.408 | 2.245 | 100% |
| **Variance of Gamma infectiousness profile** | 2.697 | 4.838 | 96% |
| **: Mean baseline transmission probability from community** | 0.002 | 0.003 | 92% |
| **: Baseline transmission probability within households** | 0.039 | 0.038 | 98% |
| **: Susceptibility age vs. age** | 1.201 | 1.098 | 96% |
| **: Susceptibility age vs. age** | 1.358 | 1.273 | 90% |
| **: Susceptibility age vs. age** | -0.275 | -0.480 | 88% |
| **: Susceptibility vaccination** | -0.631 | -0.896 | 94% |
| **: Infectiousness age vs. age** | 1.247 | 1.334 | 100% |
| **: Infectiousness age vs. age** | 0.482 | 0.370 | 96% |
| **: Infectiousness antiviral** | -0.102 | -0.174 | 98% |
| **: Infectiousness B/Victoria vs. Unsubtypable Flu B** | 0.672 | 0.781 | 96% |
| **: Infectiousness B/Yamagata vs. Unsubtypable Flu B** | 0.646 | 0.691 | 96% |
| **: Infectiousness household size vs. size** | -0.438 | -0.457 | 96% |
| **: Infectiousness household size vs. size** | -0.899 | -1.277 | 82% |

Appendix Table 17: Comparison of influenza B model using Poisson-distributed infectiousness profile with different shifts, from 0 to 4 days before symptom onset, with the main model, namely the model with a Gamma infectiousness profile and infections starting at symptom onset, including means and variances of infectiousness profiles given that the incubation was 5 days, proportions of pre-symptomatic transmission and the DIC values.

| **Infectious Profile Distribution** | **Infection Starting Day Before Symptom Onset** | **Mean (Days After Symptom Onset)** | **Variance** | **Proportion of Pre-symptomatic Transmission** | **DIC** |
| --- | --- | --- | --- | --- | --- |
| **Gamma** | **0 (Main Model)** | 1.41 (0.84, 2.06) | 2.70 (1.08, 8.79) | 0 | reference |
| **Poisson** | **3** | 0.29 (-0.57, 1.05) | - | 0.44% (0.31%, 0.64%) | -2.518 |
| **Poisson** | **2** | 0.58 (-0.23, 1.23) | - | 0.40% (0.28%, 0.62%) | -1.814 |
| **Poisson** | **4** | -0.07 (-1.10, 0.80) | - | 0.48% (0.34%, 0.70%) | -1.389 |
| **Poisson** | **1** | 0.87 (0.21, 1.47) | - | 0.34% (0.22%, 0.53%) | -1.242 |
| **Poisson** | **0** | 1.11 (0.60, 1.62) | - | 0 | -0.506 |

Appendix Table 18: Sensitivity analysis: Comparison of influenza B model using the incubation period of influenza A (1.4 days median) and Gamma-distributed infectiousness profiles with different shifts, from 0 to 4 days before symptom onset, including means and variances of infectiousness profiles given that the incubation was 5 days, proportions of pre-symptomatic transmission and the DIC values.

| **Infection Starting Day Before Symptom Onset** | **Mean (Days After Symptom Onset)** | **Variance** | **Proportion of Pre-symptomatic Transmission** | **DIC** |
| --- | --- | --- | --- | --- |
| **0** | 0.30 (-0.78, 1.16) | 2.45 (0.62, 10.18) | 0 | reference |
| **4** | -0.77 (-3.98, 0.77) | 3.63 (1.26, 7.07) | 0.65% (0.30%, 0.93%) | 0.532 |
| **1** | 0.55 (-0.65, 1.14) | 2.34 (0.76, 6.16) | 0.48% (0.12%, 0.92%) | 1.047 |
| **2** | 0.18 (-2.08, 1.00) | 2.81 (0.87, 6.43) | 0.58% (0.19%, 0.92%) | 1.221 |
| **3** | -0.33 (-3.16, 0.85) | 3.25 (1.09, 6.77) | 0.64% (0.25%, 0.93%) | 1.336 |

Appendix Table 19: Summary of SARS-CoV-2 Hong Kong data

| ***Index cases*** |  |
| --- | --- |
| **Number of index cases** | 100 |
| **Age** |  |
| **Mean (range)** | 41 (3, 95) |
| **Children (18 years)** | 19 (19%) |
| **Adults (18 – 50 years)** | 47 (47%) |
| **Old (50 years)** | 34 (34%) |
| **Vaccination doses** |  |
| **0** | 3 (3%) |
| **1** | 2 (2%) |
| **2** | 11 (11%) |
| **3** | 75 (75%) |
| **4** | 9 (9%) |
| **Number of household contacts** |  |
| **2** | 66 (66%) |
| **3** | 25 (25%) |
| **4** | 6 (6%) |
| **5** | 2 (2%) |
| **6** | 1 (1%) |
| **Total number of contacts** | 247 |
| ***Infected contacts*** |  |
| **Total number (Overall secondary infection risk)** | 83 (34%) |
| **Age** |  |
| **Mean (range)** | 37 (1, 87) |
| **Children (18 years)** | 23 (28%) |
| **Adults (18 – 50 years)** | 39 (47%) |
| **Old (50 years)** | 21 (25%) |
| **Vaccination doses** |  |
| **0** | 7 (8%) |
| **1** | 2 (2%) |
| **2** | 10 (12%) |
| **3** | 58 (70%) |
| **4** | 6 (7%) |
| ***Uninfected contacts*** |  |
| **Number of uninfected contacts** | 164 |
| **Age** |  |
| **Mean (range)** | 44 (1, 108) |
| **Children (18 years)** | 26 (16%) |
| **Adults (18 – 50 years)** | 76 (46%) |
| **Old (50 years)** | 62 (38%) |
| **Vaccination doses** |  |
| **0** | 6 (4%) |
| **1** | 5 (3%) |
| **2** | 16 (10%) |
| **3** | 115 (70%) |
| **4** | 22 (13%) |

Appendix Table 20: Comparison of SARS-CoV-2 model using Gamma-distributed infectiousness profile with different shifts, from 0 to 6 days before symptom onset, including means and variances of infectiousness profiles given that the incubation was 7 days, proportions of pre-symptomatic transmission and the DIC values. Model assuming transmission starting at 5 days before symptom onset had the lowest DIC value, and the difference in goodness-of-fit was not substantial among models with transmission starting earlier than 1 day before symptom onset.

| **Infection Starting Day Before Symptom Onset** | **Mean (Days After Symptom Onset)** | **Variance** | **Proportion of Pre-symptomatic Transmission** | **DIC** |
| --- | --- | --- | --- | --- |
| **5** | -3.41 (-5.55, -1.45) | 2.97 (0.84, 6.18) | 65.48% (52.68%, 78.86%) | reference |
| **3** | -2.43 (-3.68, -1.17) | 2.33 (0.68, 6.20) | 65.57% (51.66%, 79.23%) | 0.302 |
| **4** | -2.82 (-4.56, -1.33) | 2.71 (0.84, 5.96) | 65.13% (52.61%, 78.69%) | 0.550 |
| **6** | -3.79 (-6.34, -1.60) | 3.39 (1.15, 6.78) | 65.22% (52.08%, 78.50%) | 0.850 |
| **2** | -1.95 (-2.77, -0.95) | 1.57 (0.40, 4.68) | 67.46% (53.32%, 82.98%) | 3.344 |
| **1** | -1.20 (-1.86, -0.47) | 0.52 (0.03, 2.31) | 68.04% (46.85%, 96.51%) | 47.954 |
| **0** | -0.32 (-0.86, 0.28) | 0.13 (0.00, 1.02) | 0 | 90.738 |

Appendix Table 21: Adequacy assessment for SARS-CoV-2 main model, with a Gamma infectiousness profile and infections starting 5 days before symptom onset: Observed – Estimated (95% CI) numbers of infected household contacts by household sizes.

|  | **Number of Infected Members** | | | | | | |
| --- | --- | --- | --- | --- | --- | --- | --- |
| **Household Size** | **1** | **2** | **3** | **4** | **5** | **6** | **7** |
| **3** | 38-31 (22, 42) | 12-20 (13, 28) | 16-14 (6, 23) | - | - | - | - |
| **4** | 10-12 (6, 17) | 9-7 (3, 11) | 2-4 (1, 8) | 4-2 (0, 6) | - | - | - |
| **5** | 1-2 (0, 4) | 2-1 (0, 3) | 1-1 (0, 3) | 2-1 (0, 3) | 0-0 (0, 2) | - | - |
| **6** | 2-0 (0, 2) | 0-0 (0, 2) | 0-0 (0, 2) | 0-0 (0, 1) | 0-0 (0, 1) | 0-0 (0, 1) | - |
| **7** | 0-0 (0, 1) | 0-0 (0, 1) | 0-0 (0, 1) | 0-0 (0, 1) | 1-0 (0, 1) | 0-0 (0, 1) | 0-0 (0, 1) |

Appendix Table 22: Simulation assessment for SARS-CoV-2 main model with a Gamma infectiousness profile and infections starting 5 days before symptom onset

| **Parameters** | **Actual Values** | **Mean Estimates** | **Proportion of Coverage** |
| --- | --- | --- | --- |
| **Mean of Gamma infectiousness profile** | 2.586 | 2.996 | 100% |
| **Variance of Gamma infectiousness profile** | 2.973 | 3.129 | 100% |
| **: Baseline transmission probability from community** | 0.002 | 0.002 | 92% |
| **: Baseline transmission probability within households** | 0.302 | 0.350 | 96% |
| **: Susceptibility age vs. age** | 0.420 | 0.298 | 90% |
| **: Susceptibility age vs. age** | -0.124 | -0.243 | 98% |
| **: Susceptibility vaccination does** | -0.247 | -0.376 | 96% |
| **: Infectiousness age vs. age** | 0.202 | 0.173 | 98% |
| **: Infectiousness household size vs. size** | -0.579 | -0.592 | 94% |

Appendix Table 23: Comparison of SARS-CoV-2 model using Poisson-distributed infectiousness profile with different shifts, from 0 to 6 days before symptom onset, with the main model, namely the model with a Gamma infectiousness profile and infections starting 5 days before symptom onset, including means and variances of infectiousness profiles given that the incubation was 7 days, proportions of pre-symptomatic transmission and the DIC values.

| **Infectious Profile Distribution** | **Infection Starting Day Before Symptom Onset** | **Mean (Days After Symptom Onset)** | **Variance** | **Proportion of Pre-symptomatic Transmission** | **DIC** |
| --- | --- | --- | --- | --- | --- |
| **Gamma** | **5 (Main Model)** | -3.41 (-5.55, -1.45) | 2.97 (0.84, 6.18) | 65.48% (52.68%, 78.86%) | reference |
| **Poisson** | **5** | -2.69 (-3.91, -1.62) | - | 67.87% (53.56%, 81.81%) | 0.143 |
| **Poisson** | **6** | -3.12 (-4.49, -1.96) | - | 67.75% (54.21%, 81.34%) | 0.212 |
| **Poisson** | **3** | -1.96 (-2.81, -1.15) | - | 69.77% (54.72%, 84.01%) | 0.660 |
| **Poisson** | **4** | -2.30 (-3.28, -1.37) | - | 68.36% (53.93%, 81.84%) | 0.670 |
| **Poisson** | **2** | -1.81 (-2.65, -1.06) | - | 75.25% (57.36%, 92.32%) | 4.655 |
| **Poisson** | **1** | -1.59 (-1.98, -0.86) | - | 78.25% (51.70%, 95.66%) | 39.557 |
| **Poisson** | **0** | -0.83 (-0.99, -0.25) | - | 0 | 89.859 |

Appendix Table 24: Sensitivity analysis: Estimates of proportions of pre-symptomatic transmission of SARS-CoV-2 virus in Hong Kong, using the probability threshold ranging from 0.5% to 0.001%, assuming transmission started 5 days before symptom onset respectively.

| **Probability Threshold** | **Proportion of Pre-symptomatic Transmission** |
| --- | --- |
| **0.005** | 62.74% (50.51%, 75.10%) |
| **0.001** | 64.48% (51.84%, 77.17%) |
| **0.0005** | 65.33% (53.20%, 77.59%) |
| **0.0001** | 65.48% (52.68%, 78.86%) |
| **0.00005** | 65.57% (52.17%, 79.00%) |
| **0.00001** | 65.62% (53.19%, 78.81%) |
