# Supplementary material for: Estimating pre-symptomatic transmission potential of influenza A and B viruses in household transmission studies
Source: Research Square preprint supplement (doi:10.21203/rs.3.rs-7701955/v1), 2025-12-01

# Influenza B: Main Model vs. Models Adopting Influenza A Incubation

## Susceptibility: Age < 6 vs. 18 – 50

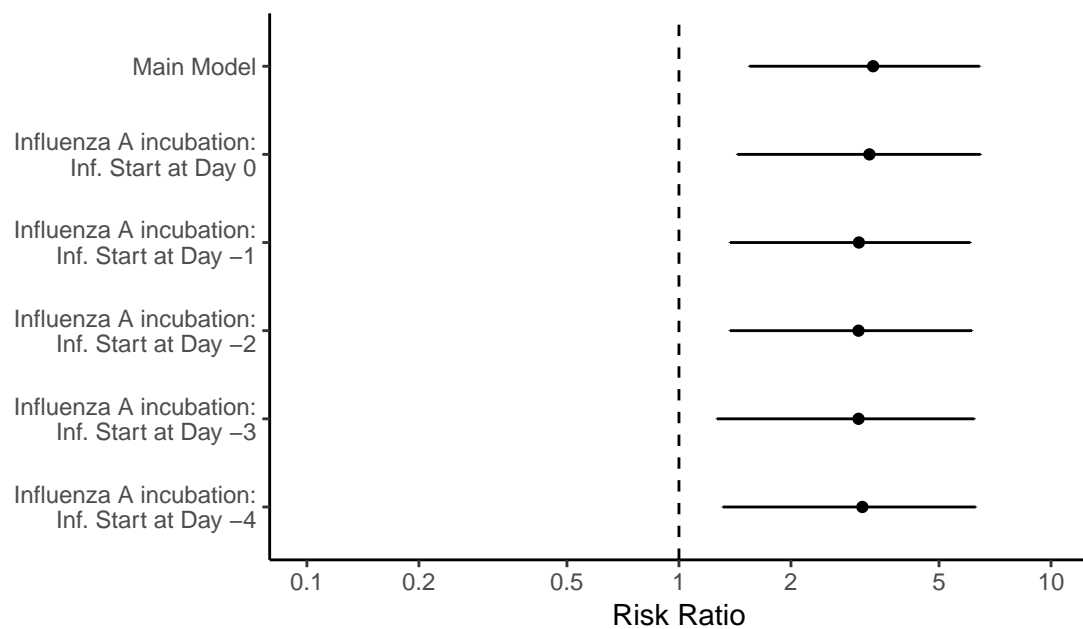

## Susceptibility: Age 6 – 17 vs. 18 – 50

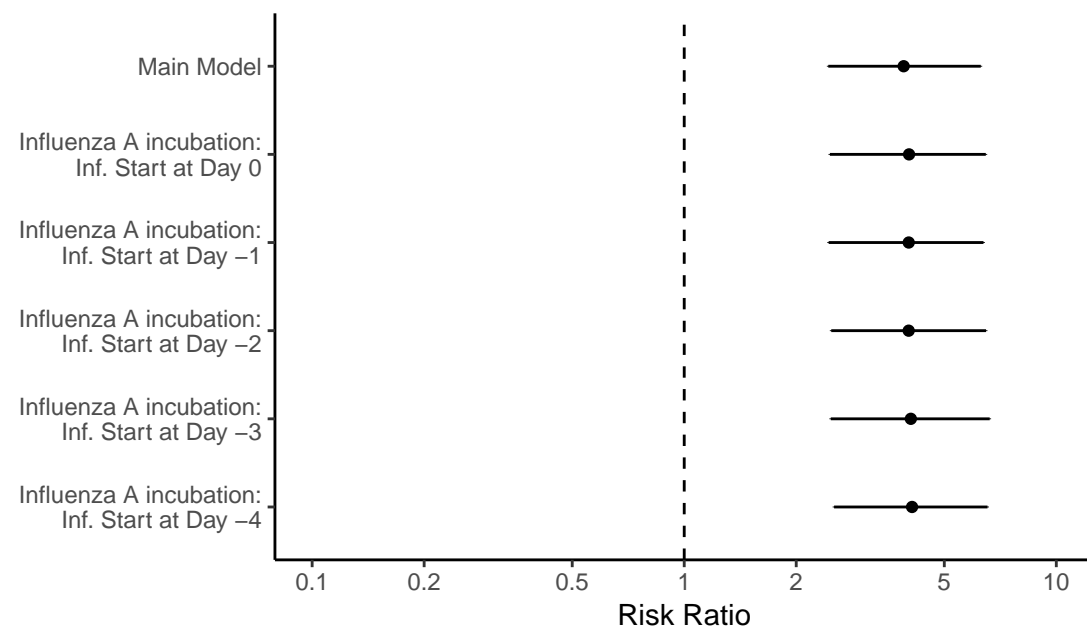

## Susceptibility: Age >50 vs. 18 – 50

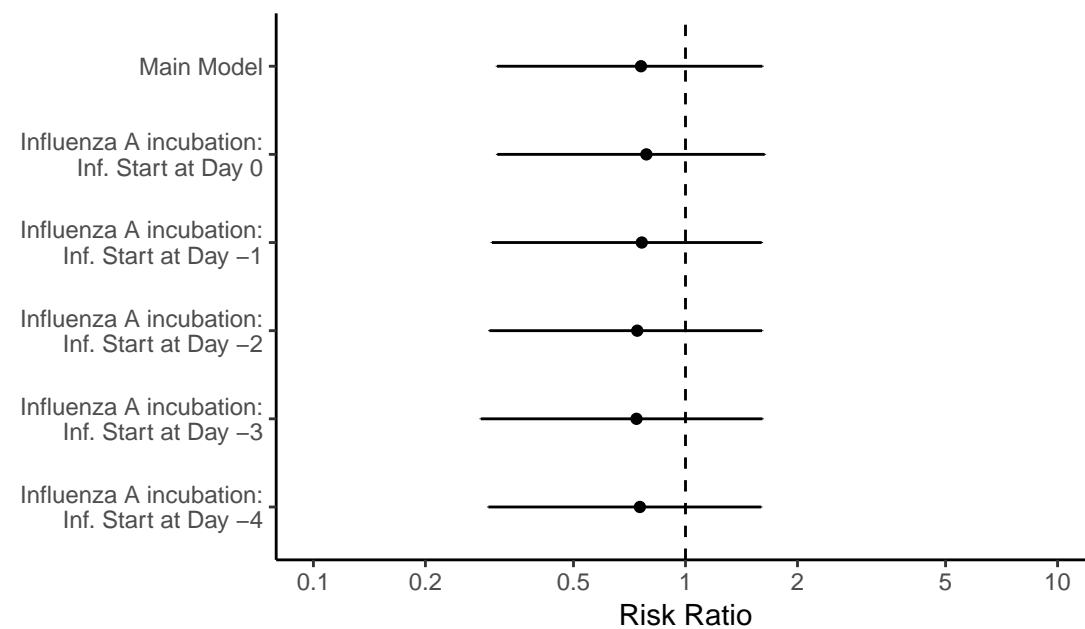

## Susceptibility: Vaccination

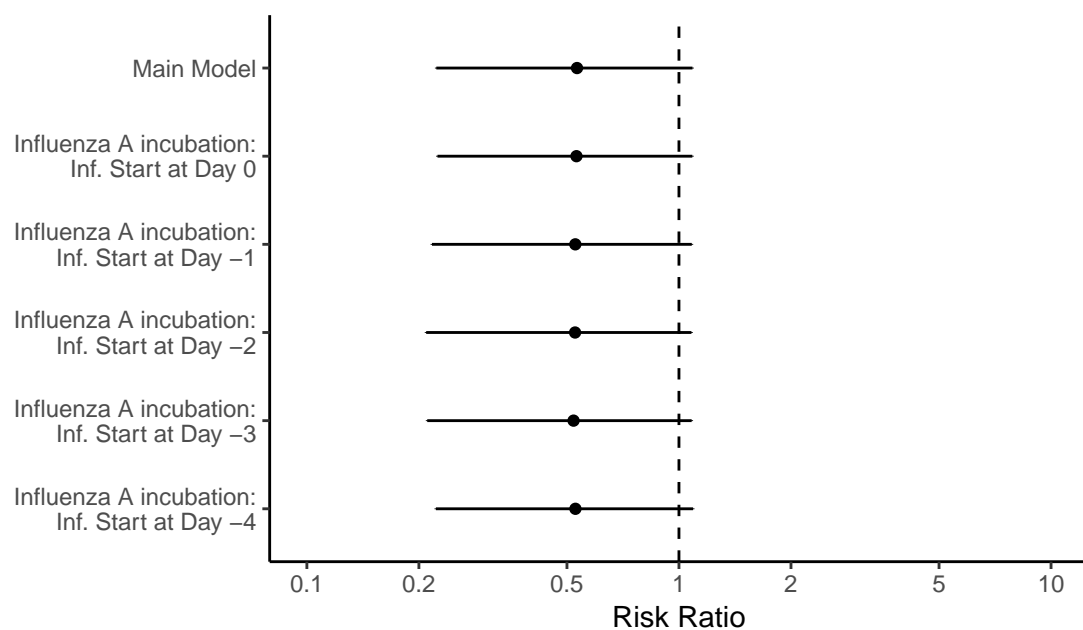

## Infectiousness: Age < 6 vs. Adults

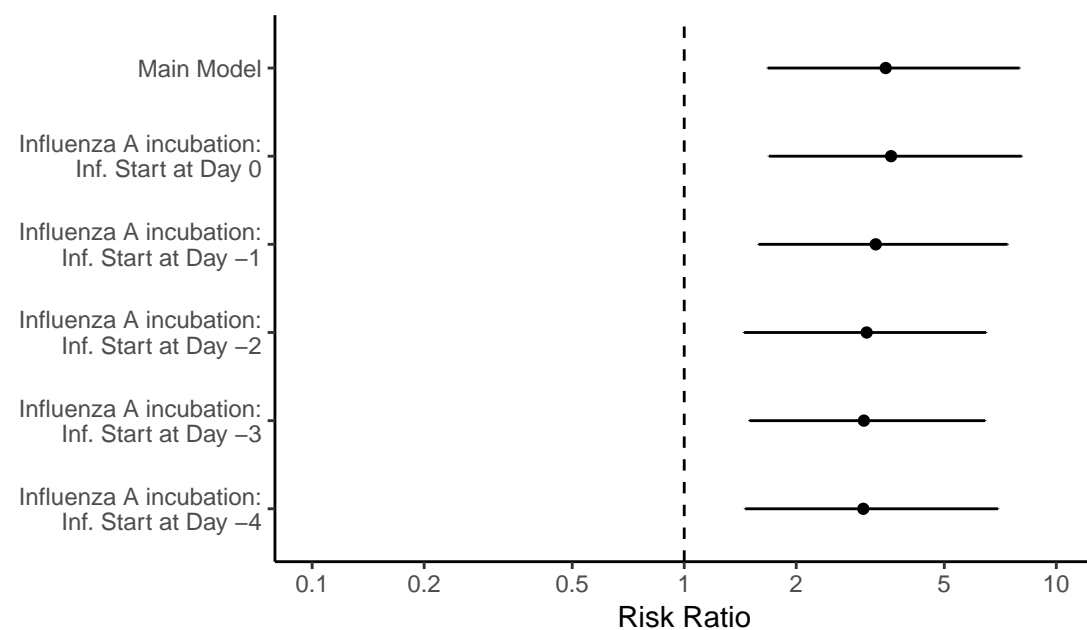

## Infectiousness: Age 6 – 17 vs. Adults

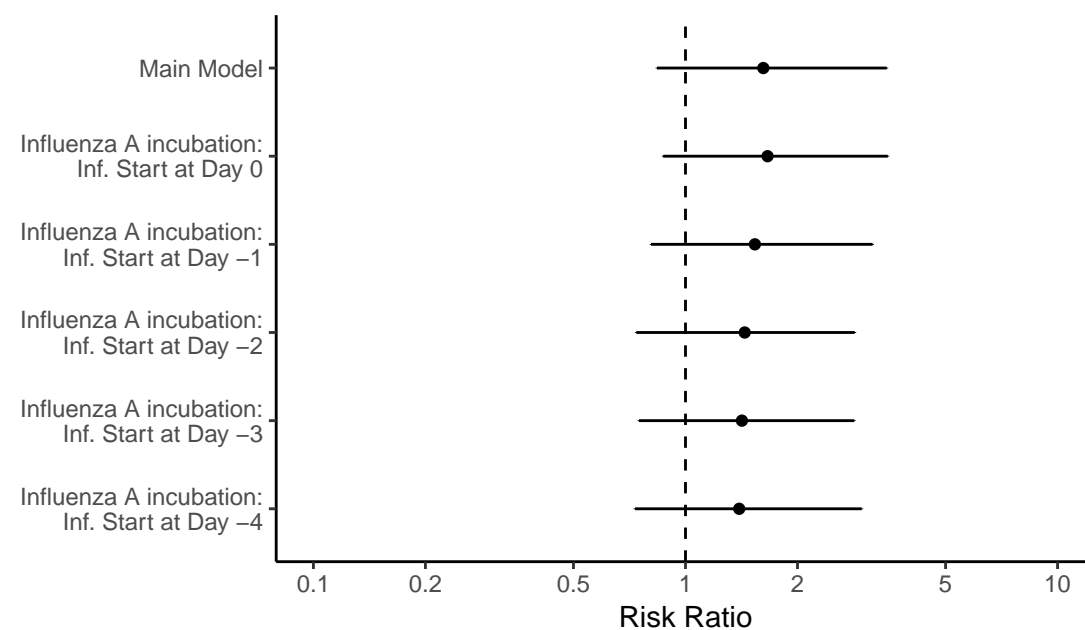

## Infectiousness: Antiviral

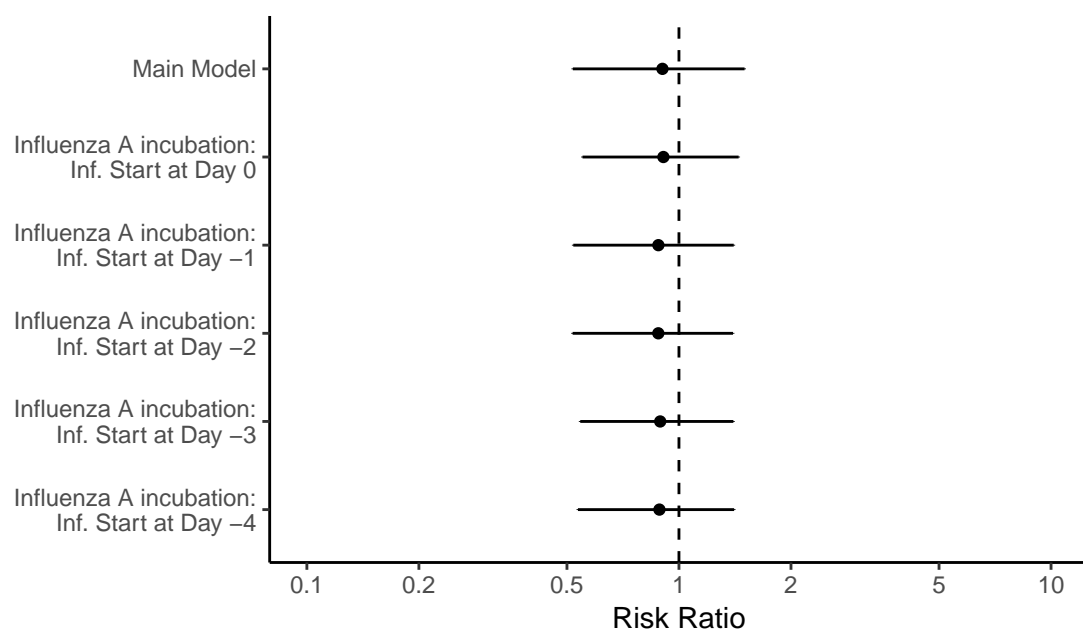

## Infectiousness: B/Victoria vs. Unsubtypable Flu B

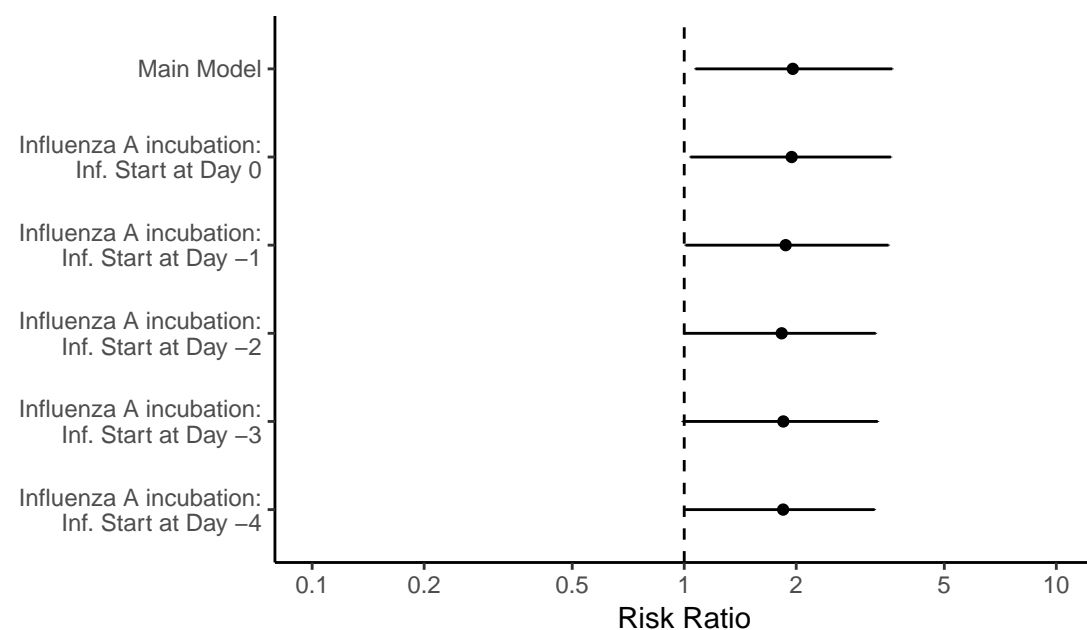

## Infectiousness: B/Yamagata vs. Unsubtypable Flu B

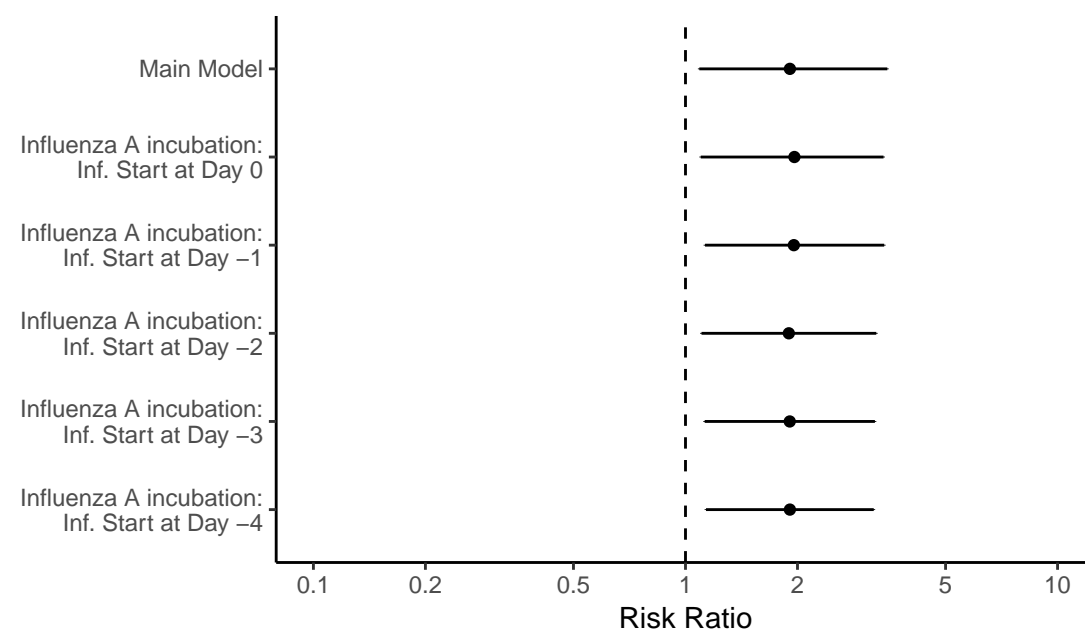

## Infectiousness: Household Size 4 – 5 vs. Size 3

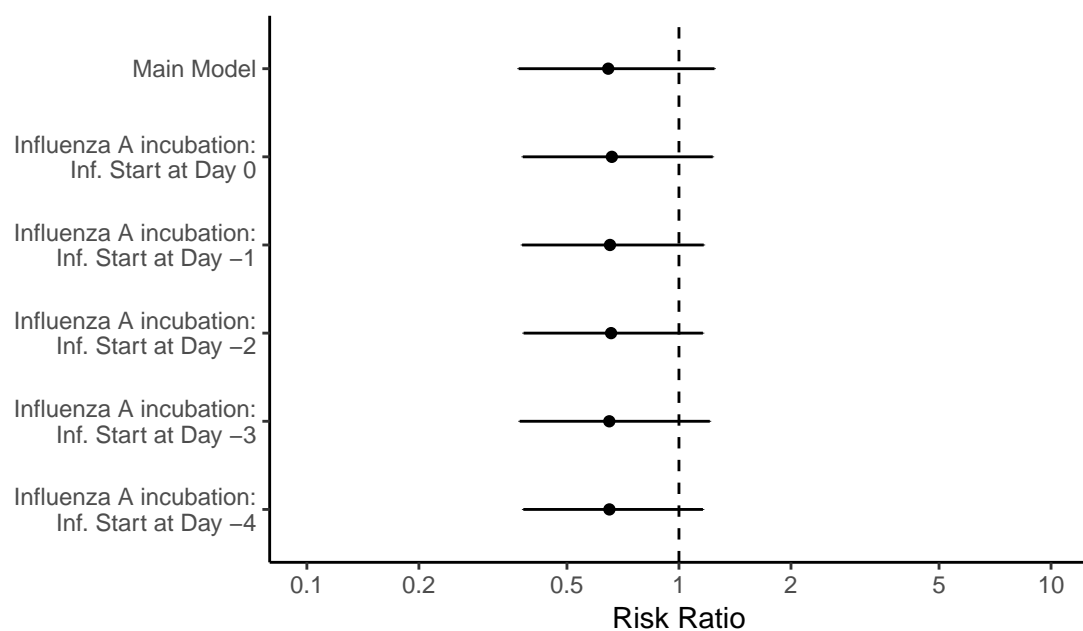

## Infectiousness: Household Size >5 vs. Size 3

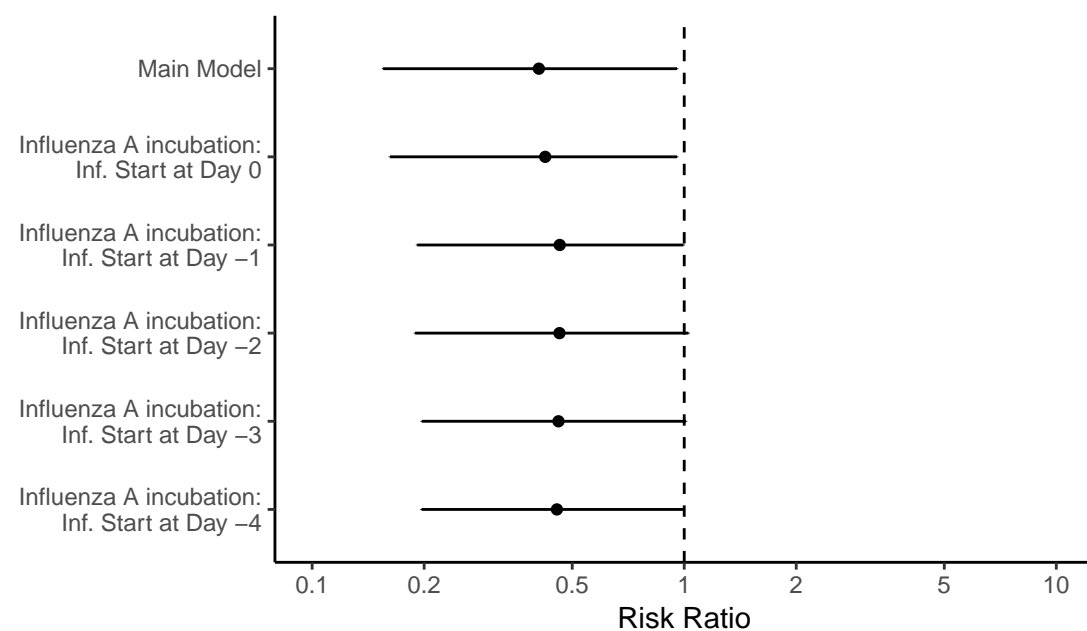

Supplement: Supplementary file 2 [file 1bc8e5fff15f404c846025a3.pdf]
