# Supplementary material for: Estimating pre-symptomatic transmission potential of influenza A and B viruses in household transmission studies
Source: Research Square preprint supplement (doi:10.21203/rs.3.rs-7701955/v1), 2025-12-01

Influenza B: Gamma Infectiousness

Susceptibility: Age < 6 vs. 18 – 50

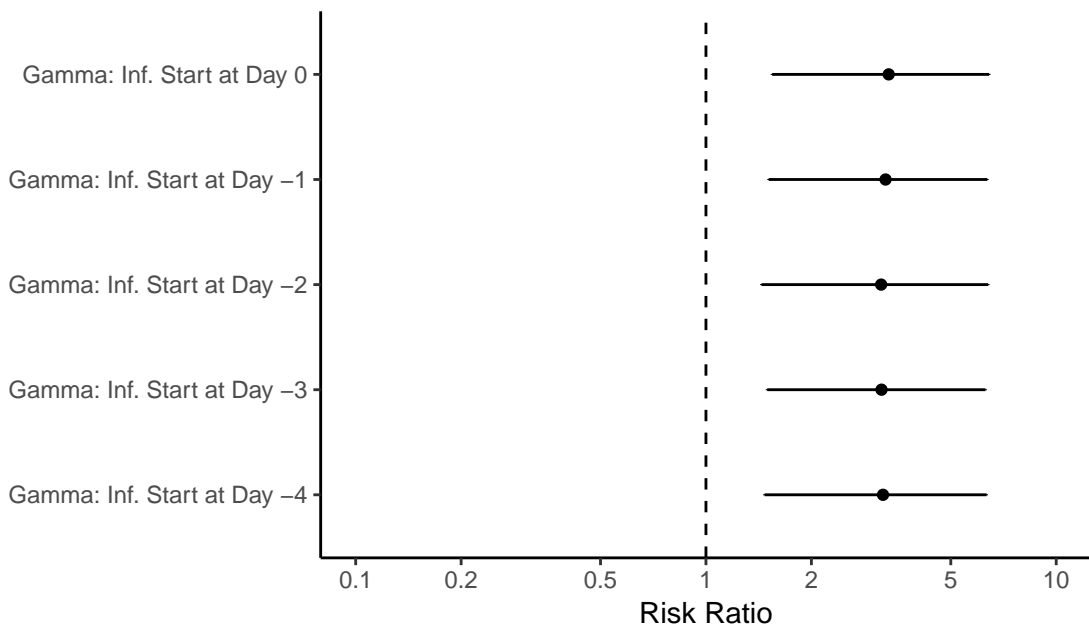

Susceptibility: Age 6 – 17 vs. 18 – 50

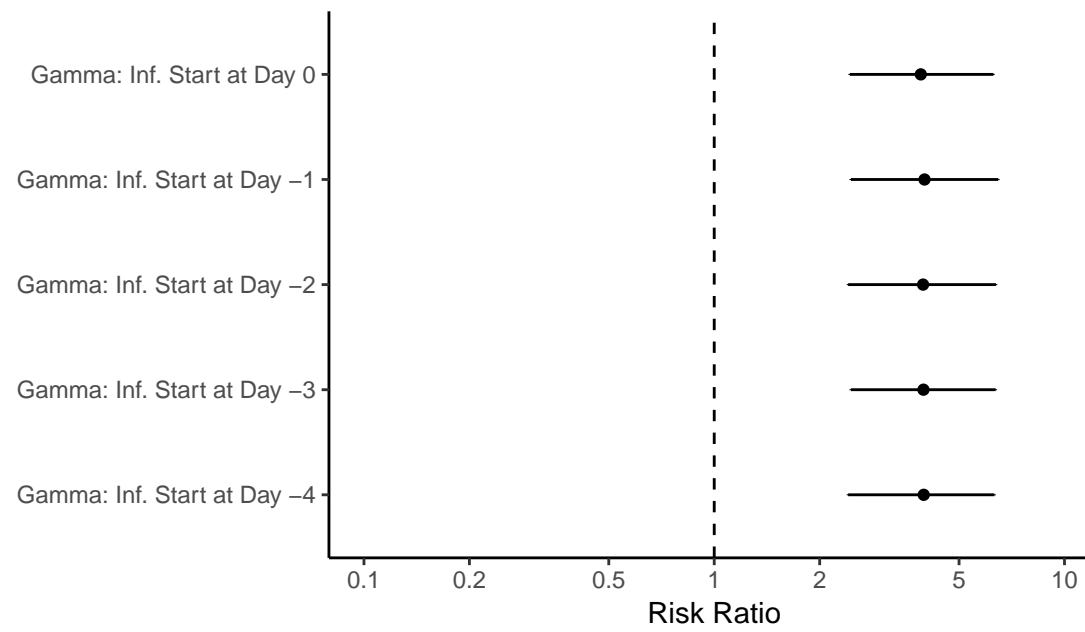

Susceptibility: Age >50 vs. 18 – 50

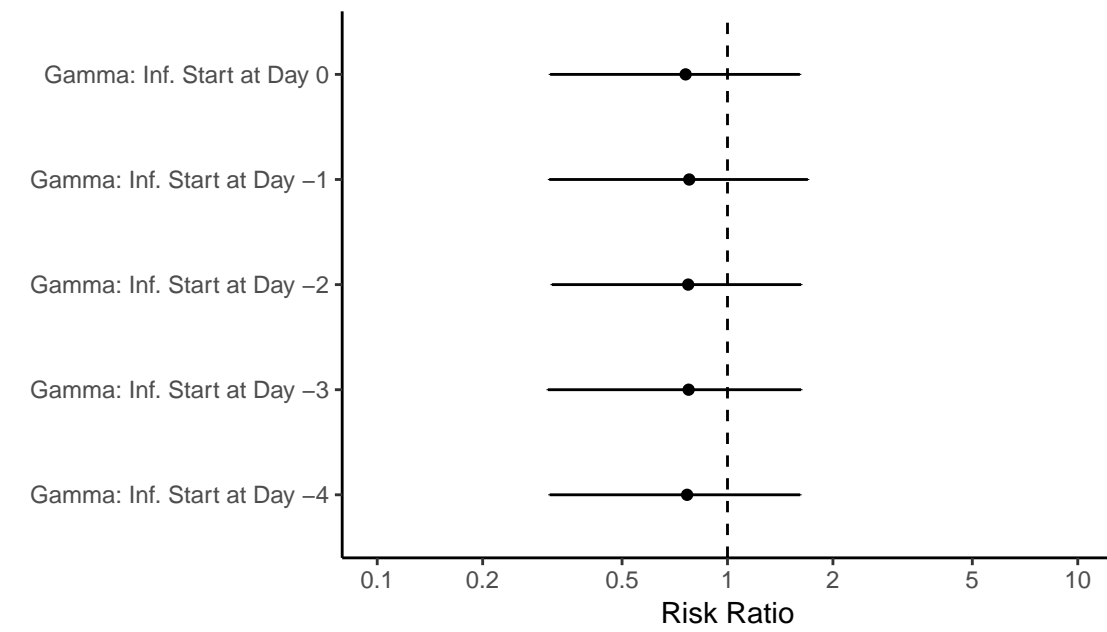

Susceptibility: Vaccination

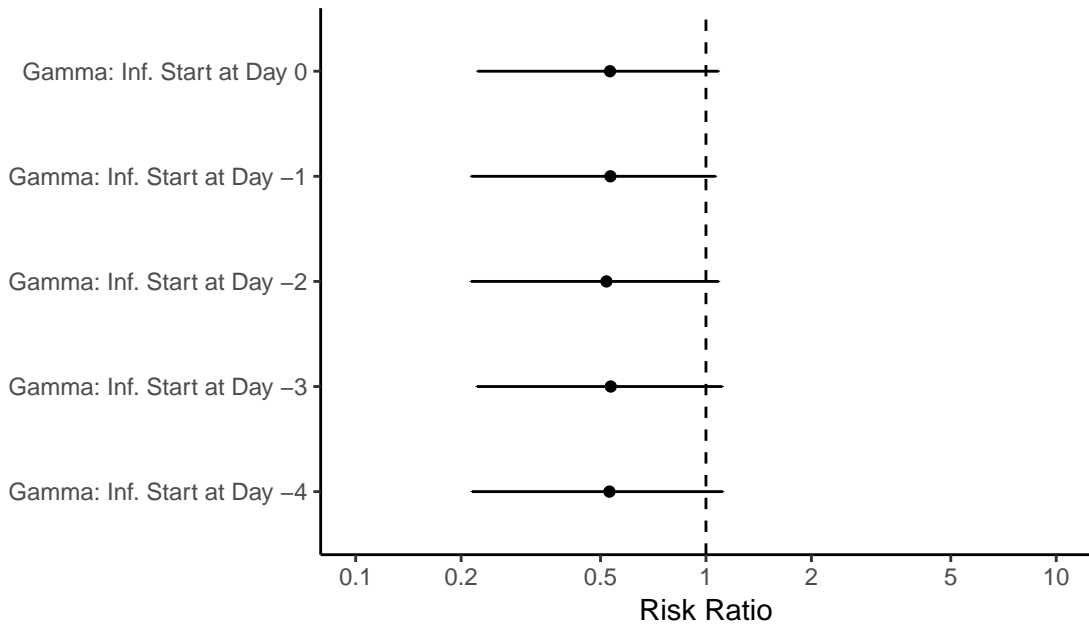

Infectiousness: Age < 6 vs. Adults

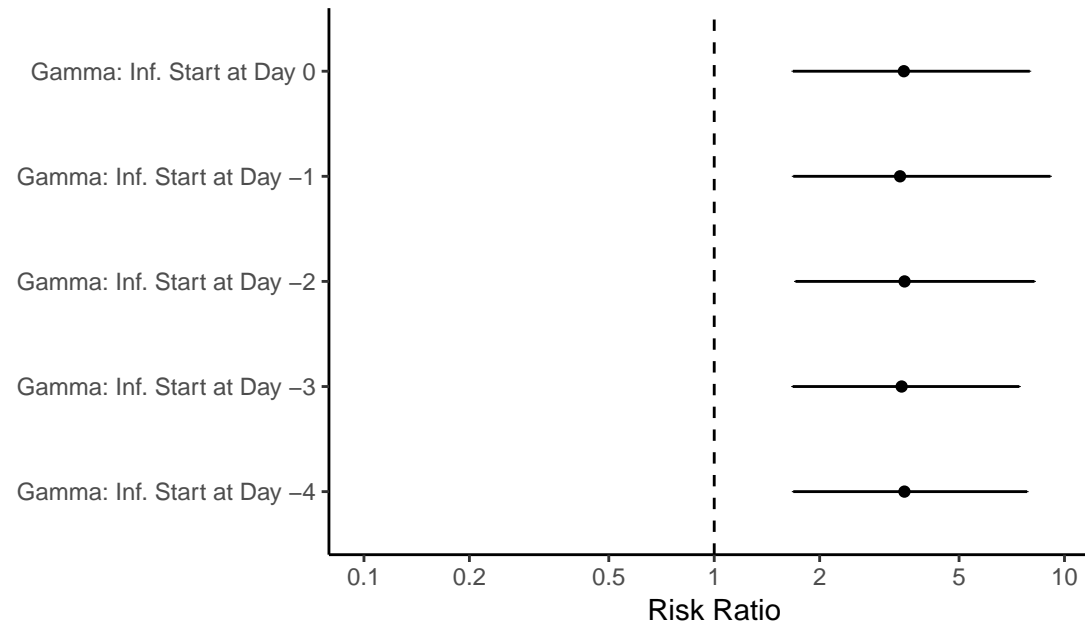

Infectiousness: Age 6 – 17 vs. Adults

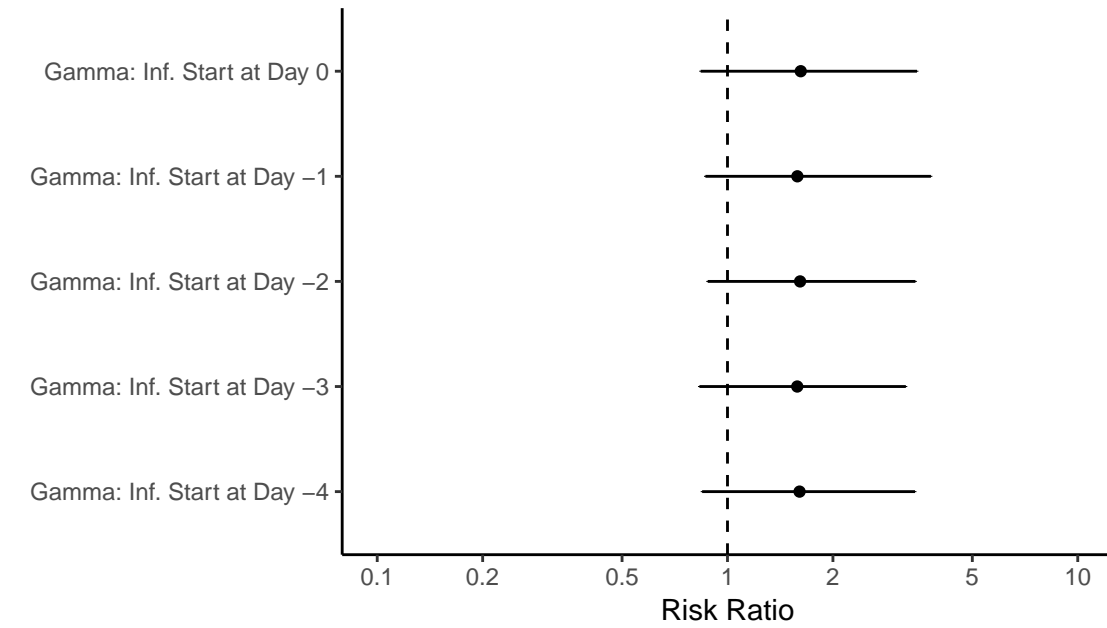

Infectiousness: Antiviral

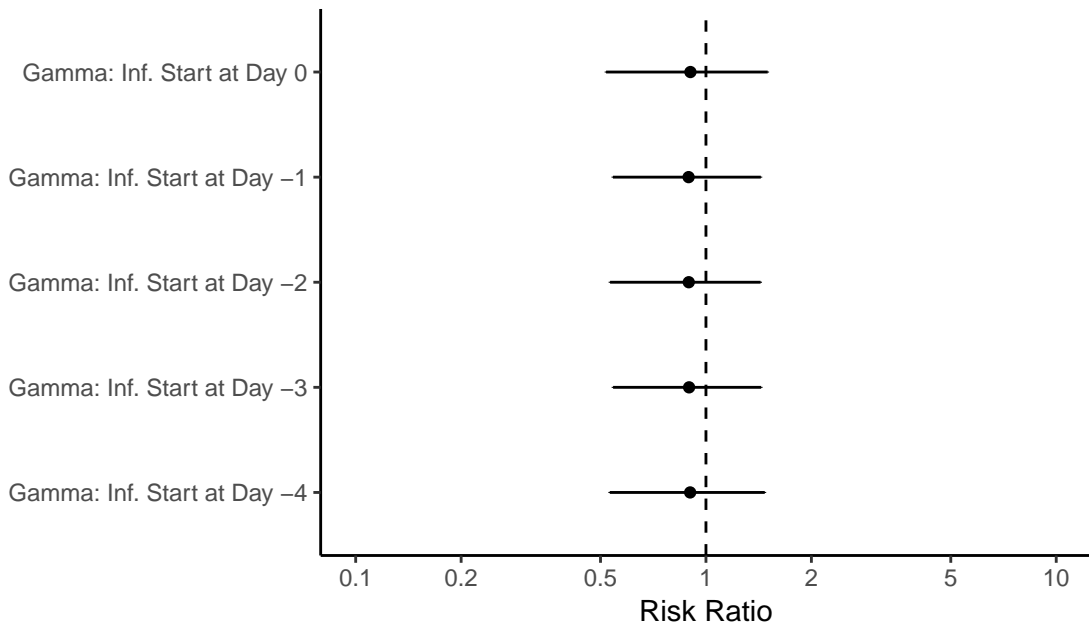

Infectiousness: B/Victoria vs. Unsubtypable Flu B

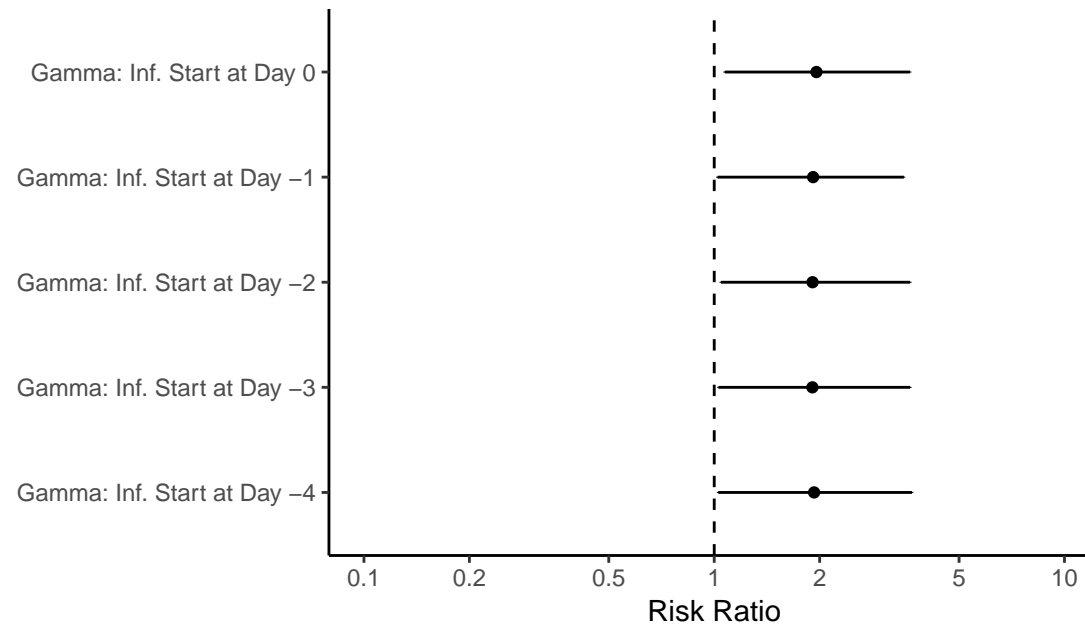

Infectiousness: B/Yamagata vs. Unsubtypable Flu B

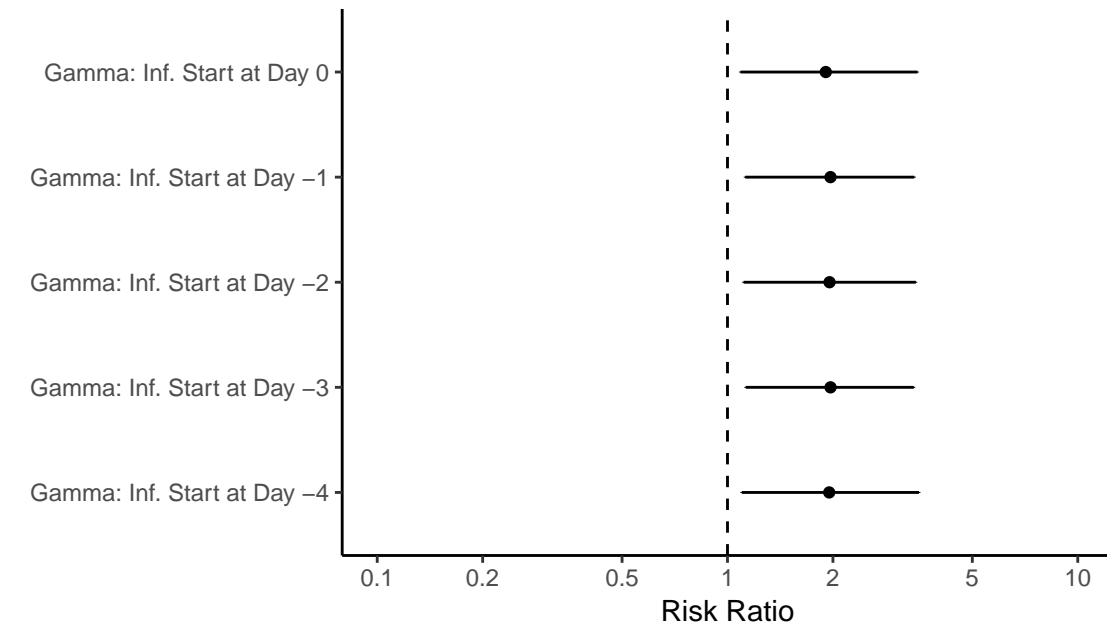

Infectiousness: Household Size 4 – 5 vs. Size 3

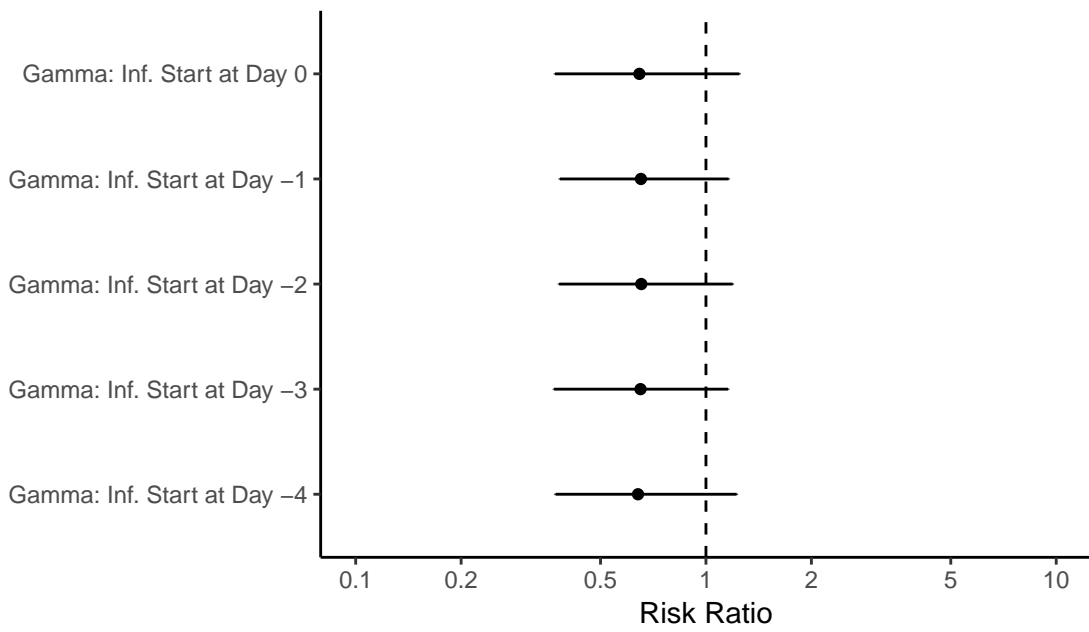

Infectiousness: Household Size >5 vs. Size 3

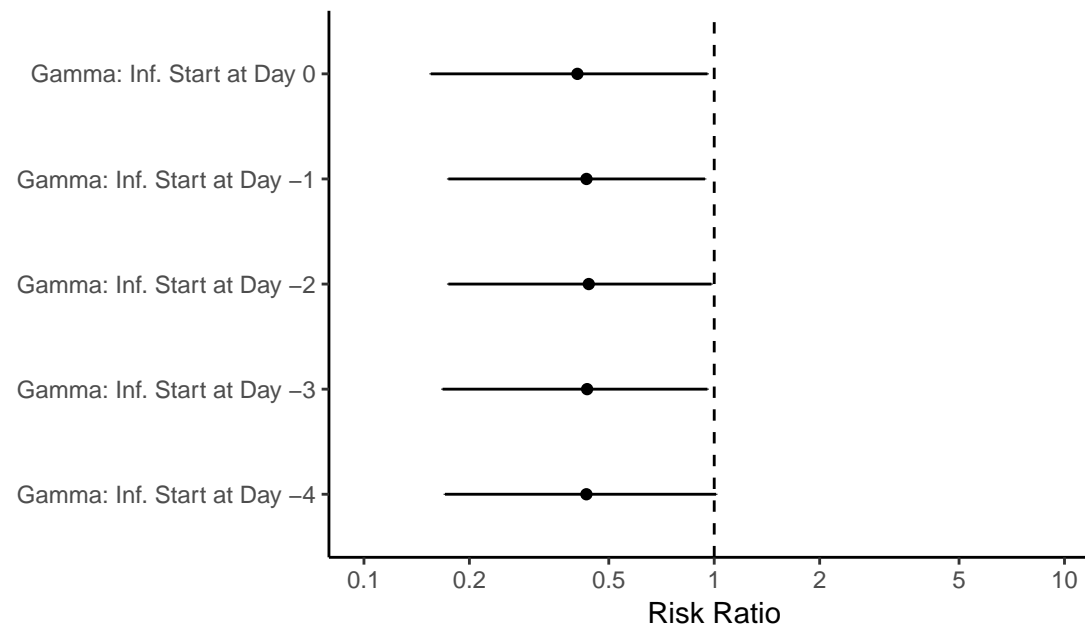

Supplement: Supplementary file 4 [file dbda1b2e32ed60edb699815a.pdf]
