# Supplementary figures and images for: Estimating pre-symptomatic transmission potential of influenza A and B viruses in household transmission studies
Source: Research Square preprint supplement (doi:10.21203/rs.3.rs-7701955/v1), 2025-12-01

SARS-CoV-2: Gamma Infectiousness

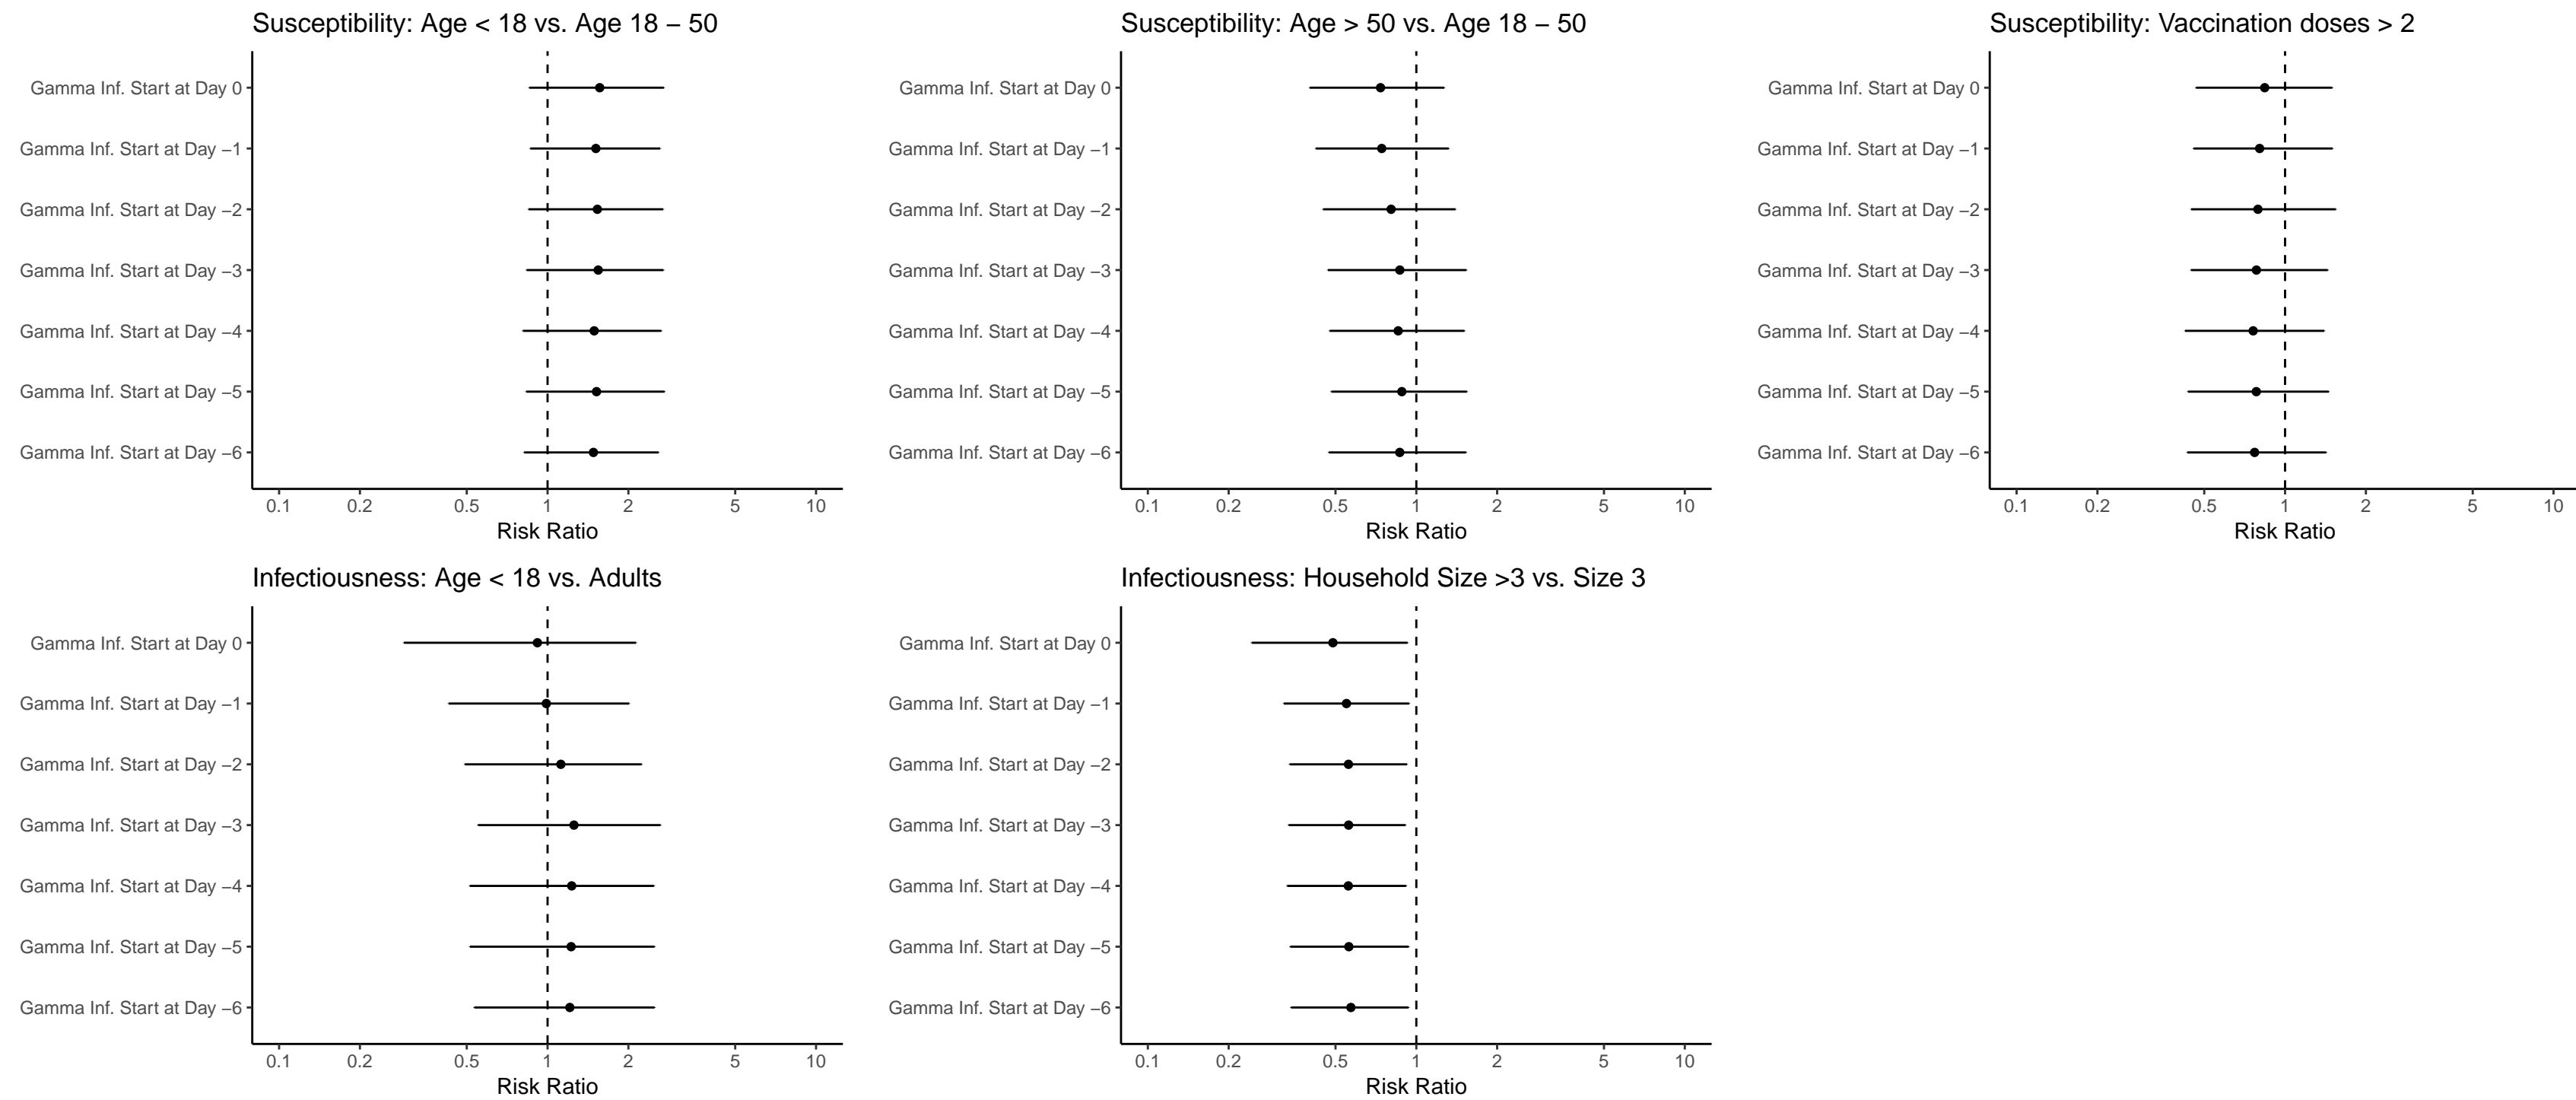

Supplement: Supplementary file 3 [file 8098b48ddbbb38c6aad4c572.pdf]
